# Supplementary material for: Optical dopamine monitoring with dLight1 reveals mesolimbic phenotypes in a mouse model of neurofibromatosis type 1
Source: eLife journal article supplement (doi:10.7554/elife.48983), 2019-09-23
Supplement: figures [file elife-48983-figures-v5.pdf]

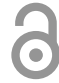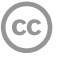

---

## Figures and figure supplements

Optical dopamine monitoring with dLight1 reveals mesolimbic phenotypes in a mouse model of neurofibromatosis type 1

**J Elliott Robinson *et al***

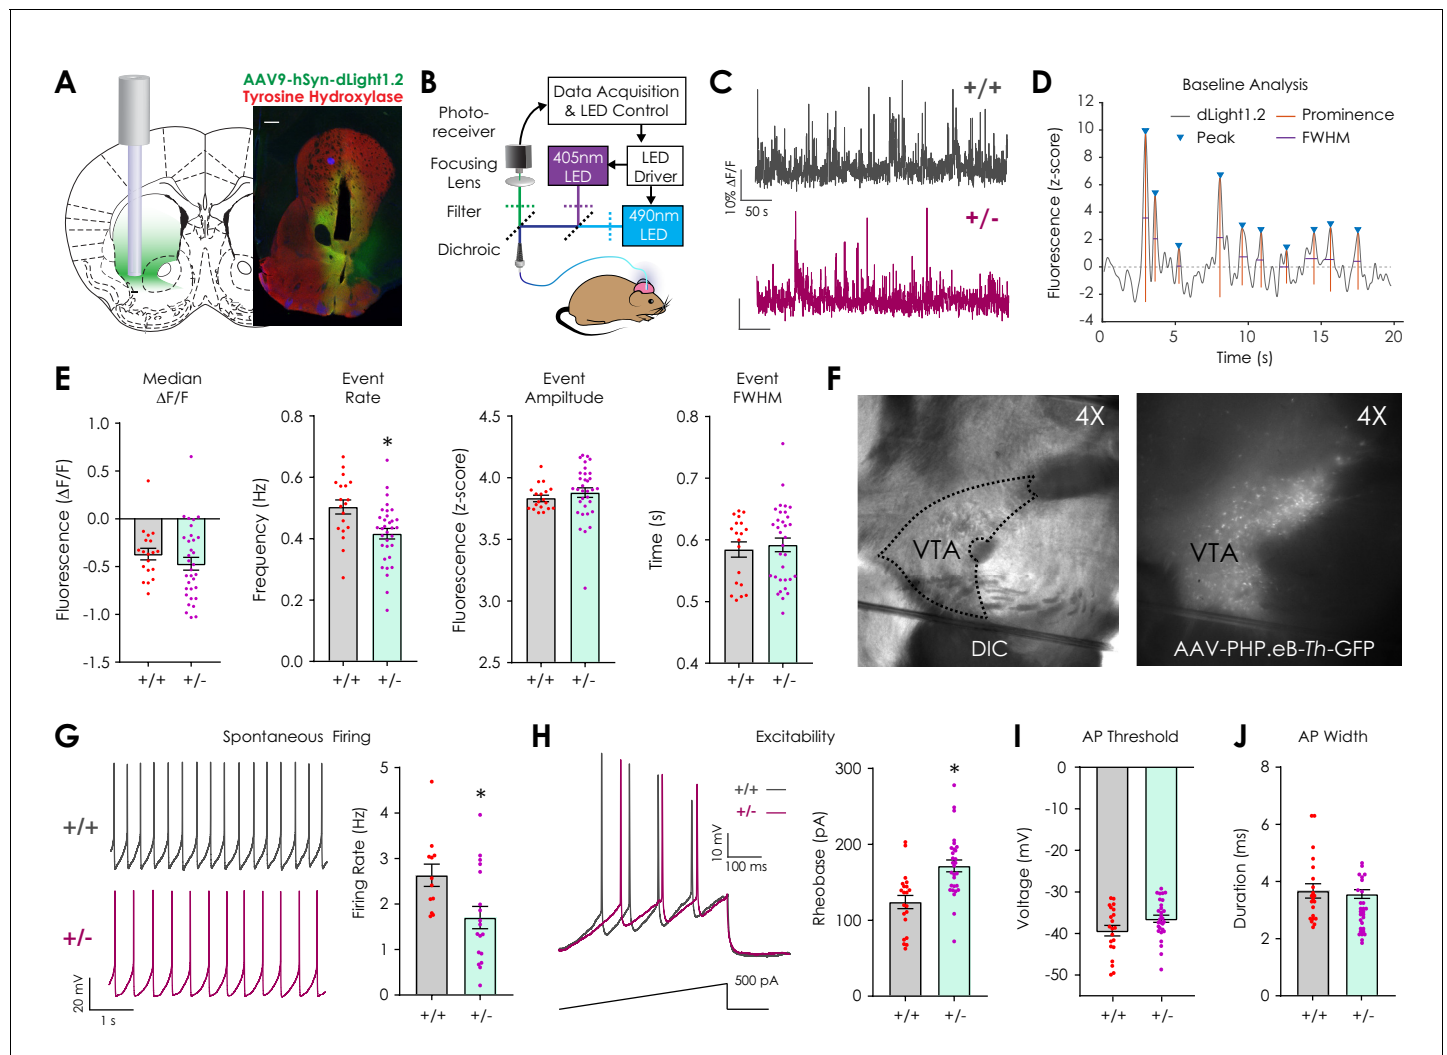

**Figure 1.** Assessment of basal dopaminergic function in vivo with dLight1.2 and ex vivo patch clamp electrophysiology. (A) Illustration showing location of stereotaxic injection of the AAV9-hSyn-dLight1.2 viral vector and photometry fiber implantation (left). Representative histological image (right, scale: 300  $\mu$ m) showing the fiber tip location and expression of dLight1.2 (stained for GFP, green) and dopaminergic terminal tyrosine hydroxylase (TH, Red). (B) Schematic of fiber photometry system used for dLight1.2 (490 nm) and isosbestic (405 nm; reference signal) excitation and emission signal detection in freely moving mice. (C) Representative dLight1.2 traces in  $Nf1^{+/+}$  and  $Nf1^{+/-}$  mice. (D) Representative trace and analysis features for baseline peak detection. (E) Peak analysis of baseline dLight1.2 recordings revealed that  $Nf1^{+/-}$  mice ( $n = 33$ ) exhibit reduced transient frequency (unpaired t-test;  $t_{50} = 3.06$ ,  $p = 0.004$ ) but not median fluorescence (unpaired t-test;  $t_{50} = 1.01$ ,  $p = 0.32$ ), transient amplitude (unpaired t-test;  $t_{50} = 0.83$ ,  $p = 0.41$ ), or full width at half maximal amplitude (FWHM; unpaired t-test;  $t_{50} = 0.43$ ,  $p = 0.67$ ) when compared to  $Nf1^{+/+}$  littermates ( $n = 19$ ). (F) 4X differential interference contrast (DIC) image (left) of an acute horizontal midbrain slice containing the ventral tegmental area (VTA) and 4X epifluorescence image (right) with GFP-labeled catecholaminergic neurons following systemic delivery of AAV-PHP.eB-Th-GFP ( $1 \times 10^{11}$  v.g./mouse). (G) Representative traces showing spontaneous whole-cell firing of putative VTA dopaminergic neurons (left). Spontaneous firing rates (right) were lower (unpaired t-test;  $t_{28} = 2.58$ ,  $p = 0.01$ ) in  $Nf1^{+/-}$  putative dopaminergic neurons ( $n = 18$ ) compared to  $Nf1^{+/+}$  neurons ( $n = 12$ ). (H) Representative electrophysiological traces (left) showing evoked firing by a 1 pA/ms ramp current from  $-60$  mV in  $Nf1^{+/+}$  and  $Nf1^{+/-}$  putative dopaminergic neurons. Rheobase (right; unpaired t-test;  $t_{48} = 4.05$ ,  $p < 0.001$ ) but not action potential threshold (I;  $t_{48} = 1.93$ ,  $p = 0.06$ ) or width (J;  $t_{48} = 0.39$ ,  $p = 0.70$ ) was increased in  $Nf1^{+/-}$  ( $n = 29$ ) putative dopaminergic neurons compared to  $Nf1^{+/+}$  ( $n = 21$ ). \*denotes  $p < 0.05$  vs  $Nf1^{+/+}$ . Data presented as mean  $\pm$  SEM.

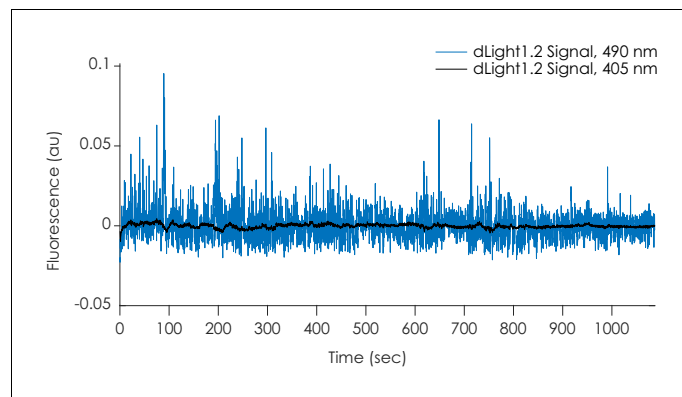

**Figure 1—figure supplement 1.** Raw fluorescent photometry signals. Example traces showing dLight1.2 fluorescence produced by simultaneous isosbestic (405 nm, *black*) or dopamine-dependent (490 nm, *blue*) excitation that were used to calculate the  $\Delta F/F$  values.

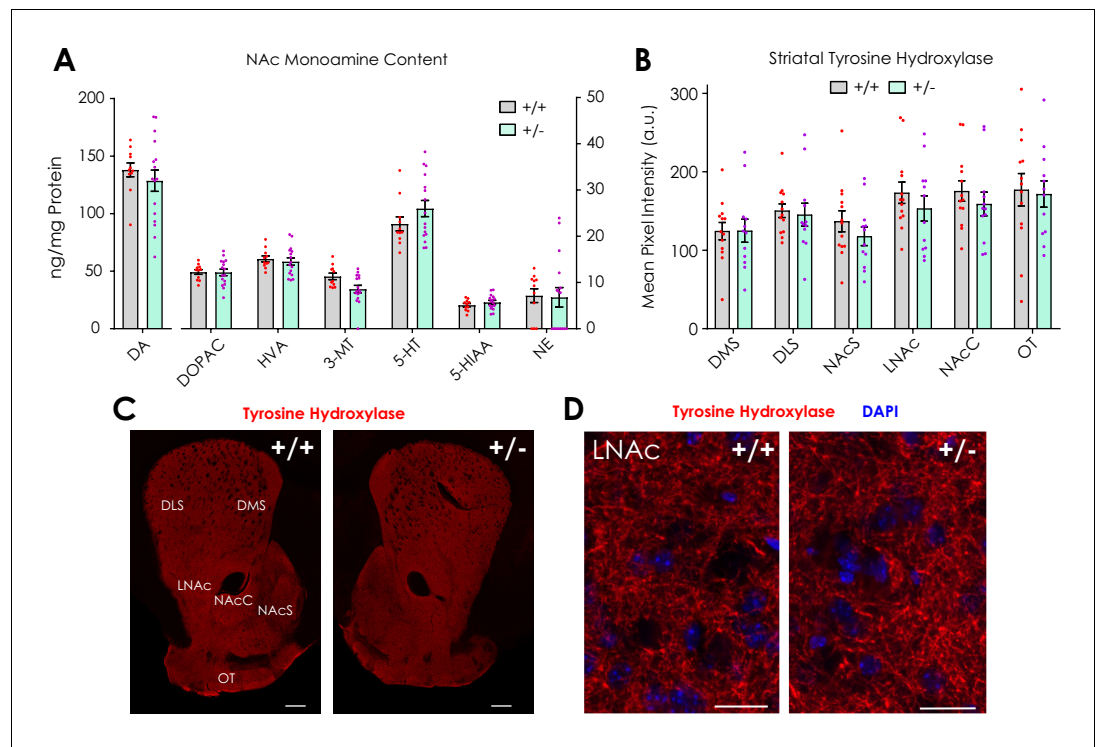

**Figure 1—figure supplement 2.** Striatal catecholamine content and tyrosine hydroxylase immunofluorescence. (A) NAc monoamine and monoamine metabolite content determined by HPLC with electrochemical detection (multiple t-tests;  $n_{+/+} = 11$ ;  $n_{+/-} = 16$ ): dopamine (DA;  $t_{25} = 0.77$ ,  $q = 0.83$ ), 3,4-dihydroxyphenylacetic acid (DOPAC;  $t_{25} = 0.076$ ,  $q = 0.99$ ), homovanillic acid (HVA;  $t_{25} = 0.52$ ,  $q = 0.90$ ), 3-methoxytyramine (3-MT;  $t_{25} = 2.44$ ,  $q = 0.16$ ), serotonin (5-HT;  $t_{25} = 1.35$ ,  $q = 0.68$ ), 5-hydroxyindoleacetic acid (5-HIAA;  $t_{25} = 1.11$ ,  $q = 0.68$ ), and norepinephrine (NE;  $t_{25} = 0.12$ ,  $q = 0.99$ ). (B) Quantification of TH expression (multiple t-tests;  $n_{+/+} = 13$ ;  $n_{+/-} = 12$ ) in the dorsolateral (DLS;  $t_{23} = 0.31$ ,  $q > 0.99$ ) and dorsomedial striatum (DMS;  $t_{23} = 0.029$ ,  $q > 0.99$ ); lateral nucleus accumbens (LNAC;  $t_{23} = 0.96$ ,  $q = 0.88$ ); nucleus accumbens core (NACc;  $t_{23} = 0.83$ ,  $q = 0.88$ ) and shell (NACs;  $t_{23} = 1.06$ ,  $q = 0.88$ ); and the olfactory tubercle (OT;  $t_{23} = 0.21$ ,  $q > 0.99$ ). (C–D) Representative fluorescent images showing dopaminergic terminal TH expression in *Nf1*<sup>+/+</sup> and *Nf1*<sup>+/-</sup> mice (C scale: 300  $\mu$ m; D scale: 20  $\mu$ m). Multiple t-tests were corrected with the two-stage linear step-up procedure of Benjamini, Krieger and Yekutieli with a false discovery rate of 5%. Data presented as mean  $\pm$  SEM.

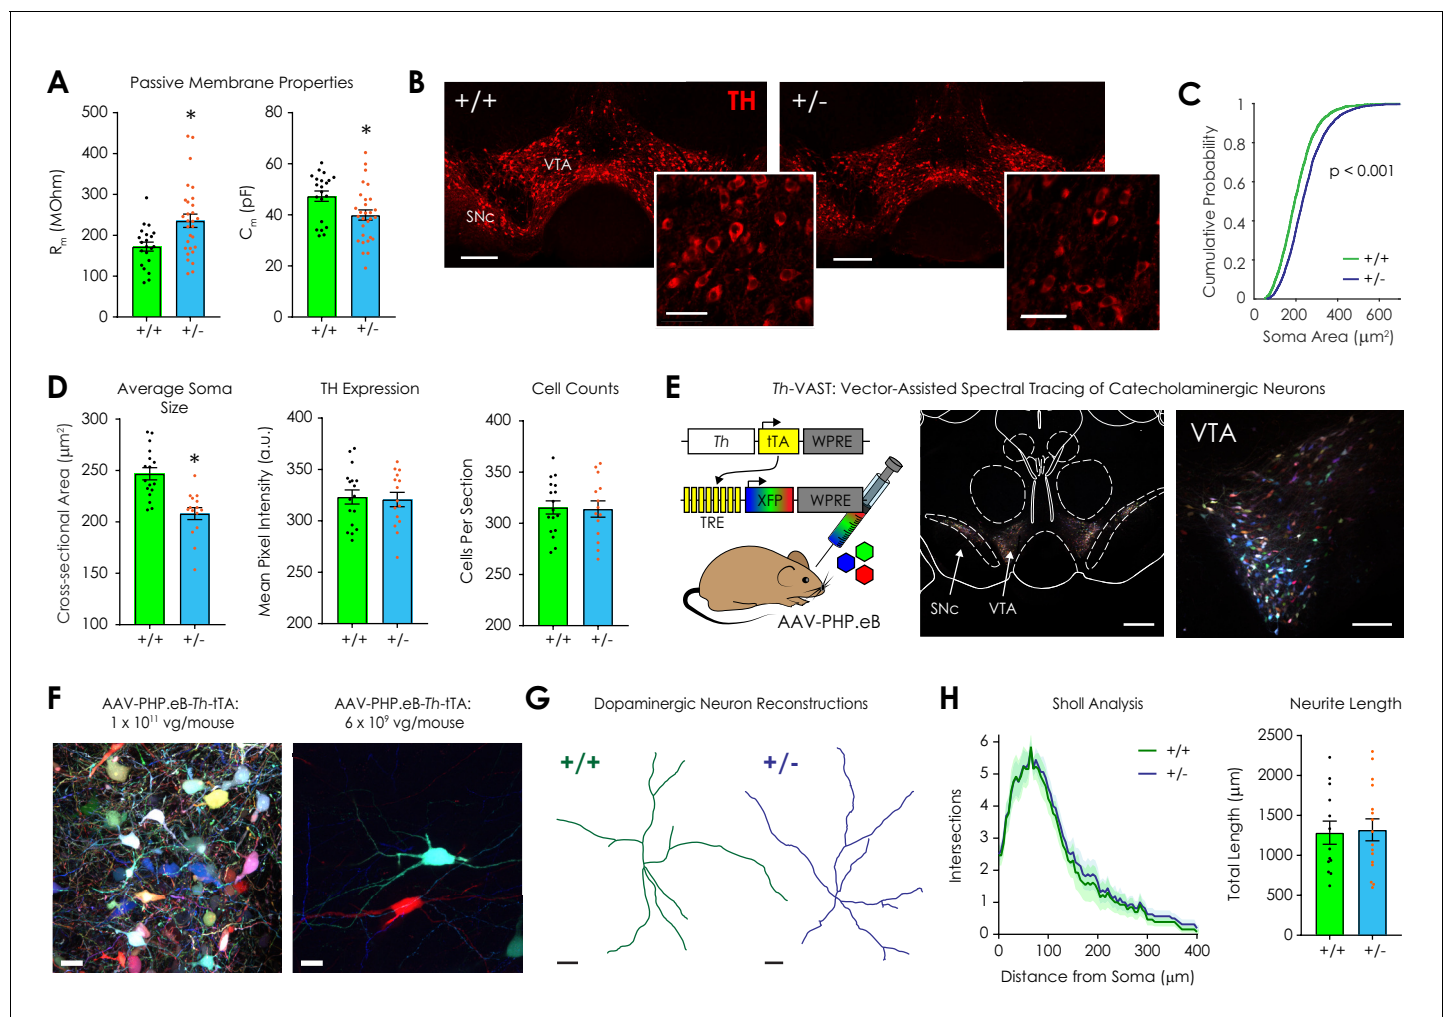

**Figure 2.** Morphological analysis of ventral tegmental dopaminergic neurons in  $Nf1^{+/+}$  and  $Nf1^{+/-}$  mice. (A) Whole-cell recordings revealed that  $Nf1^{+/-}$  putative dopaminergic neurons ( $n = 29$ ) had increased input resistance ( $R_m$ ; left; unpaired t-test;  $t_{48} = 2.97$ ,  $p = 0.005$ ) and decreased capacitance ( $C_m$ ; right;  $t_{48} = 2.54$ ,  $p = 0.01$ ) compared to  $Nf1^{+/+}$  neurons ( $n = 21$ ). (B) Representative ventral midbrain images containing the ventral tegmental area (VTA) and substantia nigra pars compacta (SNc) stained for tyrosine hydroxylase (TH, scale:  $300 \mu\text{m}$ ); TH-positive neurons in the VTA (inset, scale:  $100 \mu\text{m}$ ). (C) The cumulative probability distribution of the cross sectional area of manually traced  $Nf1^{+/+}$  ( $n = 2344$ ) and  $Nf1^{+/-}$  ( $n = 2586$ ) VTA dopaminergic neuron somata (two-sample Kolmogorov-Smirnov test;  $D = 0.18$ ,  $p < 0.001$ ). (D) Average VTA dopaminergic soma area (left;  $n_{+/+} = 17$ ,  $n_{+/-} = 15$ ; unpaired t-test;  $t_{30} = 4.65$ ,  $p < 0.001$ ), TH immunofluorescence (middle;  $t_{30} = 0.25$ ,  $p = 0.90$ ), and number of neurons/histological section (right;  $t_{30} = 0.15$ ,  $p = 0.88$ ) per mouse. (E) Th-VAST (left) produced multicolor labeling of dopaminergic neurons in the VTA (middle, scale:  $300 \mu\text{m}$ ; right, scale:  $100 \mu\text{m}$ ). (F) Dense (left, scale:  $20 \mu\text{m}$ ) or sparse multi-color labeling (right, scale:  $20 \mu\text{m}$ ) was achieved via retro-orbital injection of either  $1 \times 10^{11}$  or  $6 \times 10^9$  vg/mouse AAV-PHP.eB-Th-tTA, respectively, and  $1 \times 10^{12}$  total vg/mouse of the XFP cocktail (AAV-PHP.eB-TREx7-mRuby2, -mNeonGreen, or -mTurquoise2). (G) Representative dopaminergic neuron reconstructions following neurite tracing (scale:  $20 \mu\text{m}$ ). (H) Sholl analysis failed to detect a difference in dendritic complexity (left; two-way repeated measures ANOVA;  $F_{80,2160} = 0.052$ ,  $p_{\text{distance} \times \text{genotype}} > 0.99$ ;  $F_{80,2160} = 63.9$ ,  $p_{\text{distance}} < 0.001$ ;  $F_{1,27} = 0.25$ ,  $p_{\text{genotype}} = 0.63$ ) or total neurite length (right; unpaired t-test;  $t_{27} = 0.18$ ,  $p = 0.86$ ) between genotypes ( $n_{+/+} = 13$ ,  $n_{+/-} = 16$  for +/- group). \* denotes  $p < 0.05$  vs  $Nf1^{+/+}$ . Data presented as mean  $\pm$  SEM.

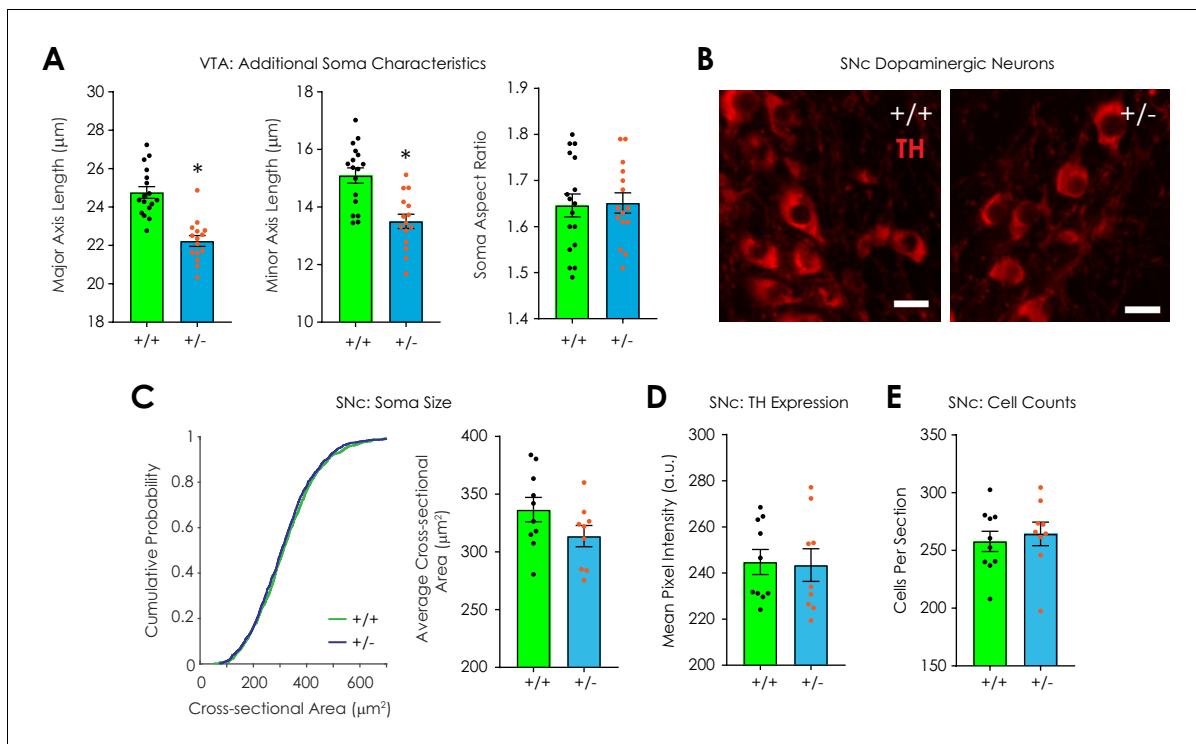

**Figure 2—figure supplement 1.** Additional data: histological analysis. (A) *Nf1*<sup>+/-</sup> dopaminergic neurons (n = 15) have smaller major axis length (left; unpaired t-test;  $t_{30} = 6.06$ ,  $p < 0.001$ ) and minor axis length (middle;  $t_{30} = 4.36$ ,  $p < 0.001$ ) compared to *Nf1*<sup>+/+</sup> dopaminergic neurons (n = 17) in the VTA; no difference in soma aspect ratio was observed (right;  $t_{30} = 0.16$ ,  $p = 0.87$ ). (B) Representative fluorescent images of tyrosine hydroxylase (TH)-labeled dopaminergic neurons in the substantia nigra pars compacta (SNc; scale = 20  $\mu\text{m}$ ). (C) The cumulative probability distribution of the cross sectional area of manually traced *Nf1*<sup>+/+</sup> (n = 1131) and *Nf1*<sup>+/-</sup> (n = 1099) SNc dopaminergic neuron somata (left; two-sample Kolmogorov-Smirnov test;  $D = 0.042$ ,  $p = 0.27$ ). Average SNc dopaminergic soma area (right;  $n_{+/+} = 10$ ;  $n_{+/-} = 9$ ; unpaired t-test;  $t_{17} = 1.63$ ,  $p = 0.12$ ). (D) Average SNc dopaminergic TH immunofluorescence ( $n_{+/+} = 10$ ;  $n_{+/-} = 9$ ;  $t_{17} = 0.15$ ,  $p = 0.88$ ). (E) Average number of dopaminergic neurons/SNc histological section ( $n_{+/+} = 10$ ;  $n_{+/-} = 9$ ;  $t_{17} = 0.49$ ,  $p = 0.63$ ) per mouse. \*denotes  $p < 0.05$ . Data presented as mean  $\pm$  SEM.

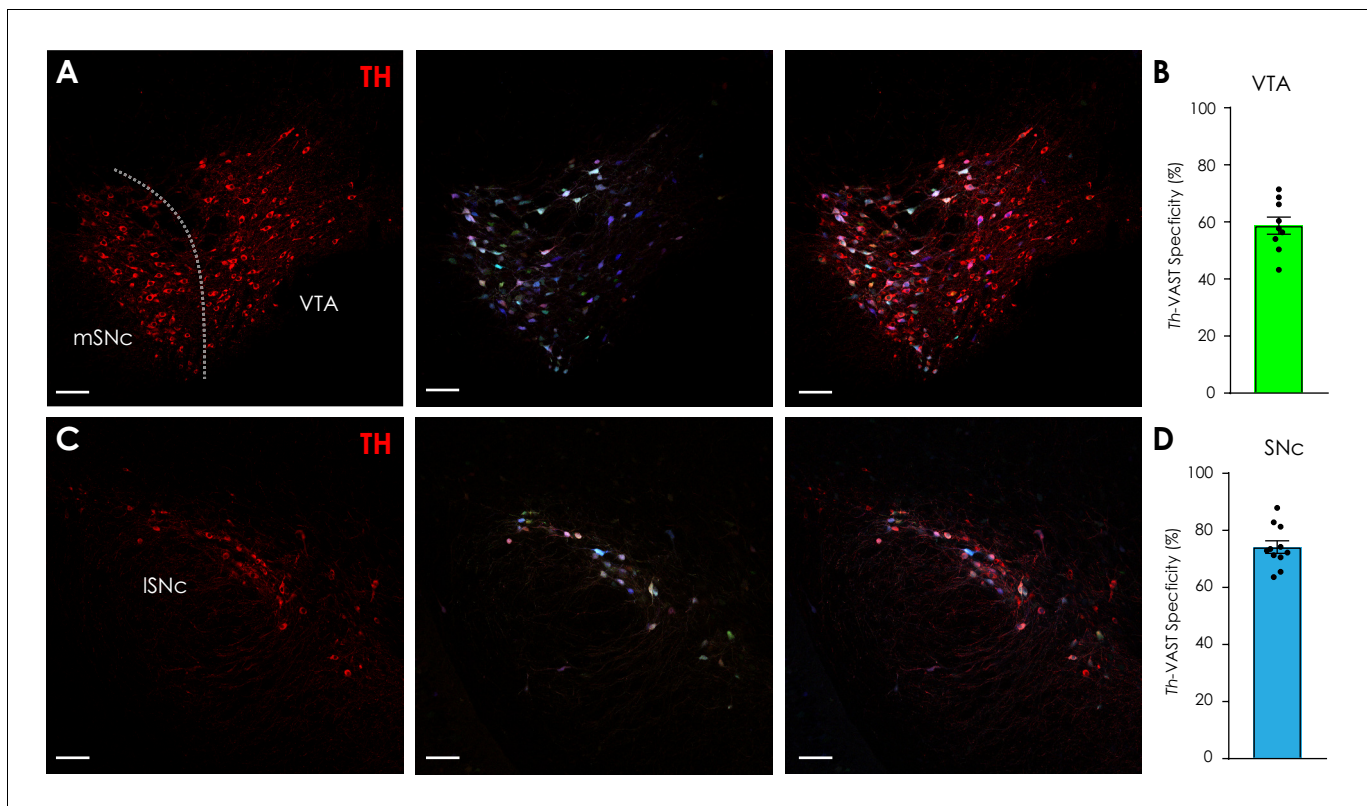

**Figure 2—figure supplement 2.** Additional data: *Th*-VAST. (A) Representative confocal images of tyrosine hydroxylase (TH)-stained (left) and *Th*-VAST-labeled (middle; AAV-PHP.eB-TRE-XFP:  $1 \times 10^{12}$  total vg/mouse total, AAV-PHP.eB-*Th*-tTA:  $1 \times 10^{11}$  vg/mouse) dopaminergic neurons in coronal sections containing the medial substantia nigra pars compacta (mSNc) and ventral tegmental area (VTA, scale = 100  $\mu$ m). (Right) Overlay. (B) Specificity of *Th*-VAST vectors in the VTA was  $58.7 \pm 3.0\%$ . Each data point represents one histological section. (C) Representative confocal images of TH-stained (left) and *Th*-VAST-labeled (middle; AAV-PHP.eB-TRE-XFP:  $1 \times 10^{12}$  total vg/mouse total, AAV-PHP.eB-*Th*-tTA:  $1 \times 10^{11}$  vg/mouse) dopaminergic neurons in coronal sections containing the lateral substantia nigra pars compacta (lSNc, scale = 100  $\mu$ m). (Right) Overlay. (D) Specificity of *Th*-VAST vectors in the SNc was  $74.2 \pm 2.2\%$ . Each data point represents one histological section. Data presented as mean  $\pm$  SEM.

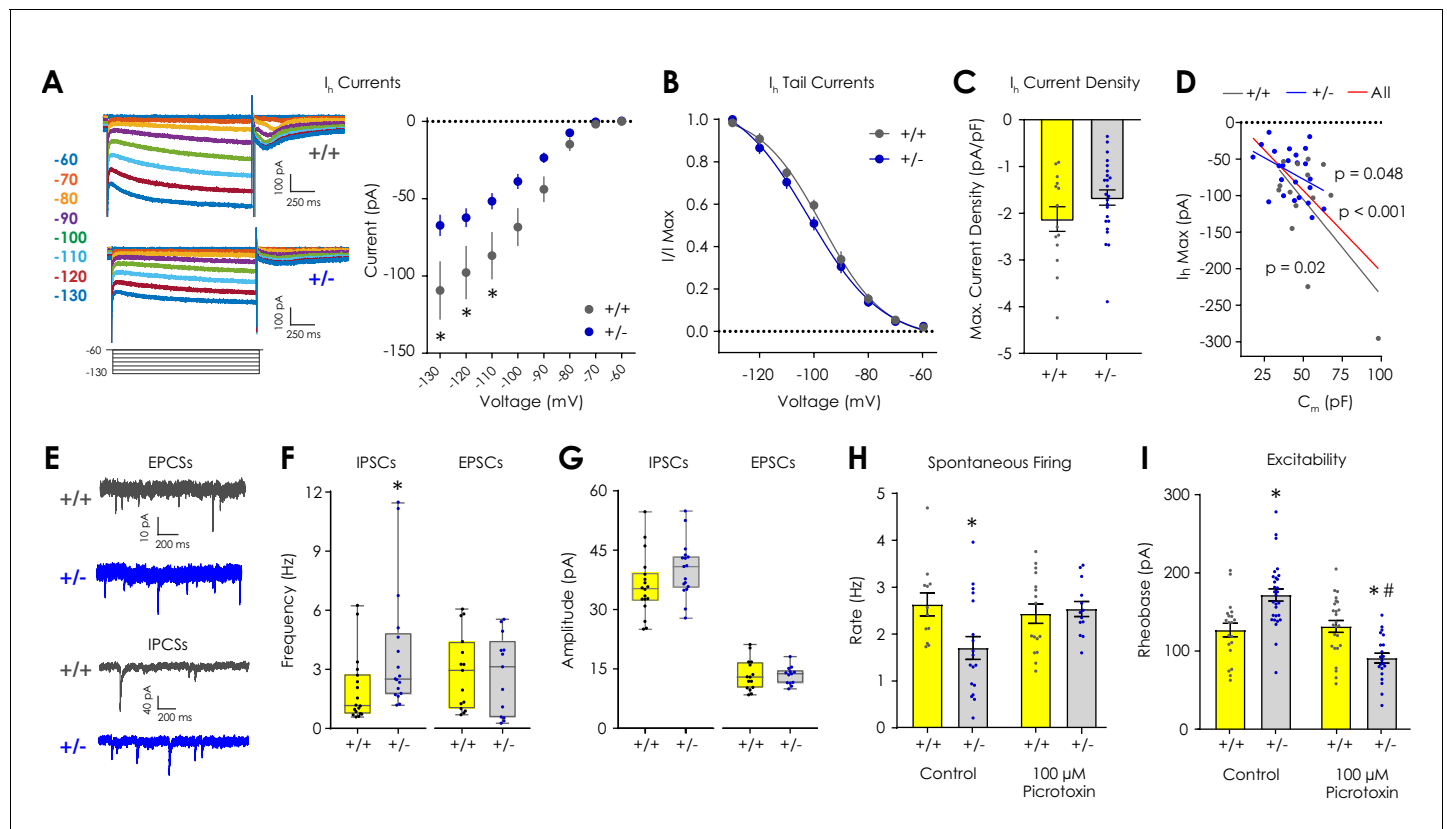

**Figure 3.** Electrophysiological characterization of  $I_{h_v}$ , inhibitory, and excitatory currents in VTA dopaminergic neurons ex vivo. (A) Representative traces showing  $I_h$  currents during hyperpolarizing voltage steps from  $-60$  to  $-130$  mV. (B)  $I_h$  current magnitude was smaller (2-way repeated measures ANOVA with Bonferroni post hoc tests;  $F_{7,252} = 5.38$ ,  $p_{\text{genotype} \times \text{voltage}} < 0.001$ ) in  $Nf1^{+/-}$  putative dopaminergic neurons ( $n = 24$ ) compared to  $Nf1^{+/+}$  neurons ( $n = 14$ ). (C) Tail current analysis showed no difference in the  $I_h$  voltage dependence between  $Nf1^{+/+}$  ( $n = 14$ ,  $EV_{50} = -96.98$  mV, 95% CI =  $-99.69$  to  $-94.52$  mV) and  $Nf1^{+/-}$  putative dopaminergic neurons ( $n = 24$ ,  $EV_{50} = -101.9$  mV, 95% CI =  $-106.5$  to  $-98.86$  mV). (D) Maximum  $I_h$  current density did not differ between  $Nf1^{+/+}$  ( $n = 14$ ) and  $Nf1^{+/-}$  ( $n = 24$ ) putative dopaminergic neurons (unpaired t-test;  $t_{36} = 1.56$ ,  $p = 0.13$ ). (E)  $I_h$  magnitude was negatively correlated with  $C_m$  in  $Nf1^{+/+}$  ( $R^2 = 0.39$ ,  $p = 0.02$ ),  $Nf1^{+/-}$  ( $R^2 = 0.17$ ,  $p = 0.049$ ), and across all putative dopaminergic neurons ( $R^2 = 0.35$ ,  $p < 0.001$ ). (F) Representative traces of spontaneous excitatory (sEPSCs) and inhibitory (sIPSC) post-synaptic currents. (G) The frequency of sIPSCs ( $n_{+/+} = 18$ ,  $n_{+/-} = 17$ ; Mann-Whitney U test;  $U = 74.5$ ,  $p = 0.009$ ; unpaired t-test;  $t_{33} = 2.20$ ,  $p = 0.03$ ) but not sEPSCs ( $n_{+/+} = 15$ ,  $n_{+/-} = 13$ ;  $U = 87.0$ ,  $p = 0.65$ ;  $t_{26} = 0.19$ ,  $p = 0.85$ ) was lower in  $Nf1^{+/-}$  putative dopaminergic neurons. (H) Amplitude of sIPSCs ( $n_{+/+} = 18$ ,  $n_{+/-} = 17$ ;  $U = 96.5$ ,  $p = 0.06$ ;  $t_{33} = 1.63$ ,  $p = 0.11$ ) and sEPSCs ( $n_{+/+} = 15$ ,  $n_{+/-} = 13$ ;  $U = 90.0$ ,  $p = 0.75$ ;  $t_{26} = 0.07$ ,  $p = 0.94$ ). (I)  $100 \mu\text{M}$  picrotoxin rescued spontaneous firing of  $Nf1^{+/-}$  putative dopaminergic neurons ( $n_{+/+} = 16$ ,  $n_{+/-} = 13$ ; two-way ANOVA with Bonferroni post hoc tests;  $F_{1,55} = 5.18$ ,  $p_{\text{genotype} \times \text{drug}} = 0.03$ ; control:  $p_{+/+ \text{ vs } +/-} = 0.03$ , picrotoxin:  $p_{+/+ \text{ vs } +/-} > 0.99$ ) relative to control neurons ( $n_{+/+} = 12$ ,  $n_{+/-} = 18$ ) and (J) lowered rheobase ( $n_{+/+} = 25$ ,  $n_{+/-} = 20$ ) relative to control  $Nf1^{+/-}$  neurons ( $n_{+/+} = 21$ ,  $n_{+/-} = 24$ ;  $F_{1,91} = 30.0$ ,  $p_{\text{genotype} \times \text{drug}} < 0.001$ ; control:  $p_{+/+ \text{ vs } +/-} < 0.001$ , picrotoxin:  $p_{+/+ \text{ vs } +/-} = 0.003$ ,  $Nf1^{+/-}$ :  $p_{\text{control vs picrotoxin}} < 0.001$ ). \* denotes  $p < 0.05$  vs  $Nf1^{+/+}$ . # denotes  $p < 0.05$  vs control. Data presented as mean  $\pm$  SEM, except box plots in F-G.

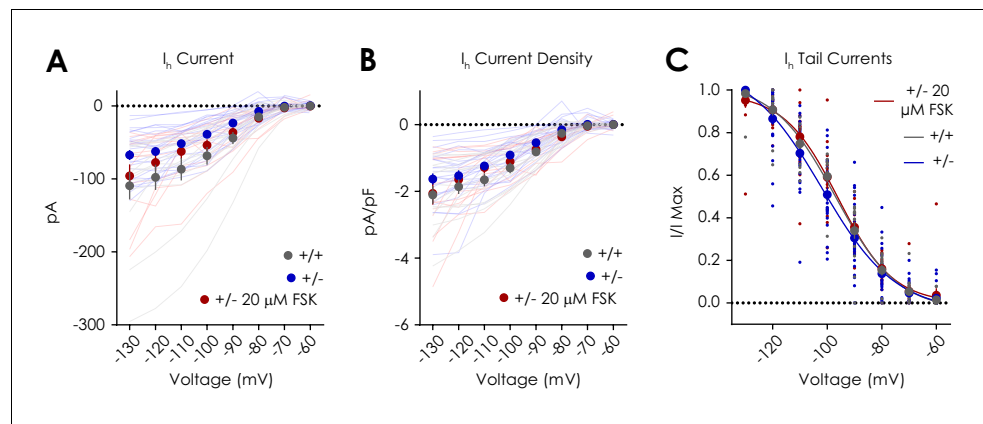

**Figure 3—figure supplement 1.** Effect of 20 μM forskolin (FSK) on putative dopaminergic neuron  $I_h$  currents. (A) Hyperpolarizing voltage steps from -60 mV to -130 mV evoked voltage-dependent increases in  $I_h$  current density that were genotype dependent ( $n_{+/+} = 14$ ,  $n_{+/-} = 24$ ,  $n_{+/- \text{ FSK}} = 14$ ; two-way repeated measures ANOVA with Bonferroni post hoc tests;  $F_{14,343} = 2.79$ ,  $p_{\text{voltage} \times \text{treatment group}} < 0.001$ ;  $F_{7,343} = 130.2$ ,  $p_{\text{voltage}} < 0.001$ ;  $F_{2,49} = 3.44$ ,  $p_{\text{treatment group}} = 0.04$ ;  $p_{+/+ \text{ vs. } +/-} = 0.04$ ;  $p_{+/+ \text{ vs. } +/- \text{ FSK}} = 0.92$ ;  $p_{+/- \text{ vs. } +/- \text{ FSK}} = 0.49$ ). (B) Voltage-dependent increases in  $I_h$  current density ( $F_{7,343} = 150.2$ ,  $p_{\text{voltage}} < 0.001$ ) did not depend on treatment condition ( $F_{14,343} = 1.12$ ,  $p_{\text{voltage} \times \text{treatment group}} = 0.33$ ;  $F_{2,49} = 1.83$ ,  $p_{\text{treatment group}} = 0.17$ ;  $p_{+/+ \text{ vs. } +/-} = 0.21$ ;  $p_{+/+ \text{ vs. } +/- \text{ FSK}} > 0.99$ ;  $p_{+/- \text{ vs. } +/- \text{ FSK}} = 0.79$ ). (C) 20 μM forskolin did not affect the voltage dependence of  $I_h$  in  $Nf1^{+/-}$  ( $n = 14$ ; EV50 = -95.96 mV; 95% CI = -98.93 to -93.11 mV) when compared to control  $Nf1^{+/+}$  ( $n = 14$ ; EV50 = -96.98 mV; 95% CI = -99.69 to -94.52 mV) and  $Nf1^{+/-}$  ( $n = 24$ ; EV50 = -101.9 mV; 95% CI = -106.5 to -98.86 mV) putative dopaminergic neurons. Data presented as mean  $\pm$  SEM.

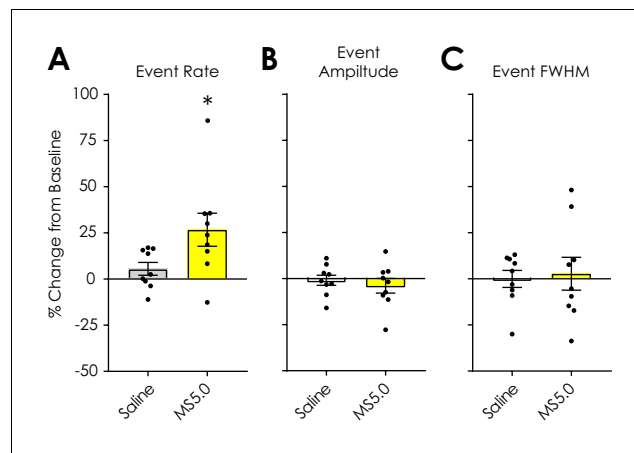

**Figure 3—figure supplement 2.** Effect of 5 mg/kg morphine sulfate on spontaneous dLight1.2 transients in *Nf1*<sup>+/-</sup> mice. (A) Pre-treatment with 5.0 mg/kg (s.c.) morphine sulfate (MS5.0) increased dLight1.2 transient rate versus saline pre-treatment (paired t-test;  $t_8 = 2.65$ ,  $p=0.03$ ) in *Nf1*<sup>+/-</sup> mice ( $n = 9$ ). (B) Morphine had no effect on dLight1.2 transient amplitude ( $t_8 = 0.82$ ,  $p=0.44$ ) or (C) full width at half maximal amplitude (FWHM;  $t_8 = 0.40$ ,  $p=0.70$ ). Data presented as mean  $\pm$  SEM.

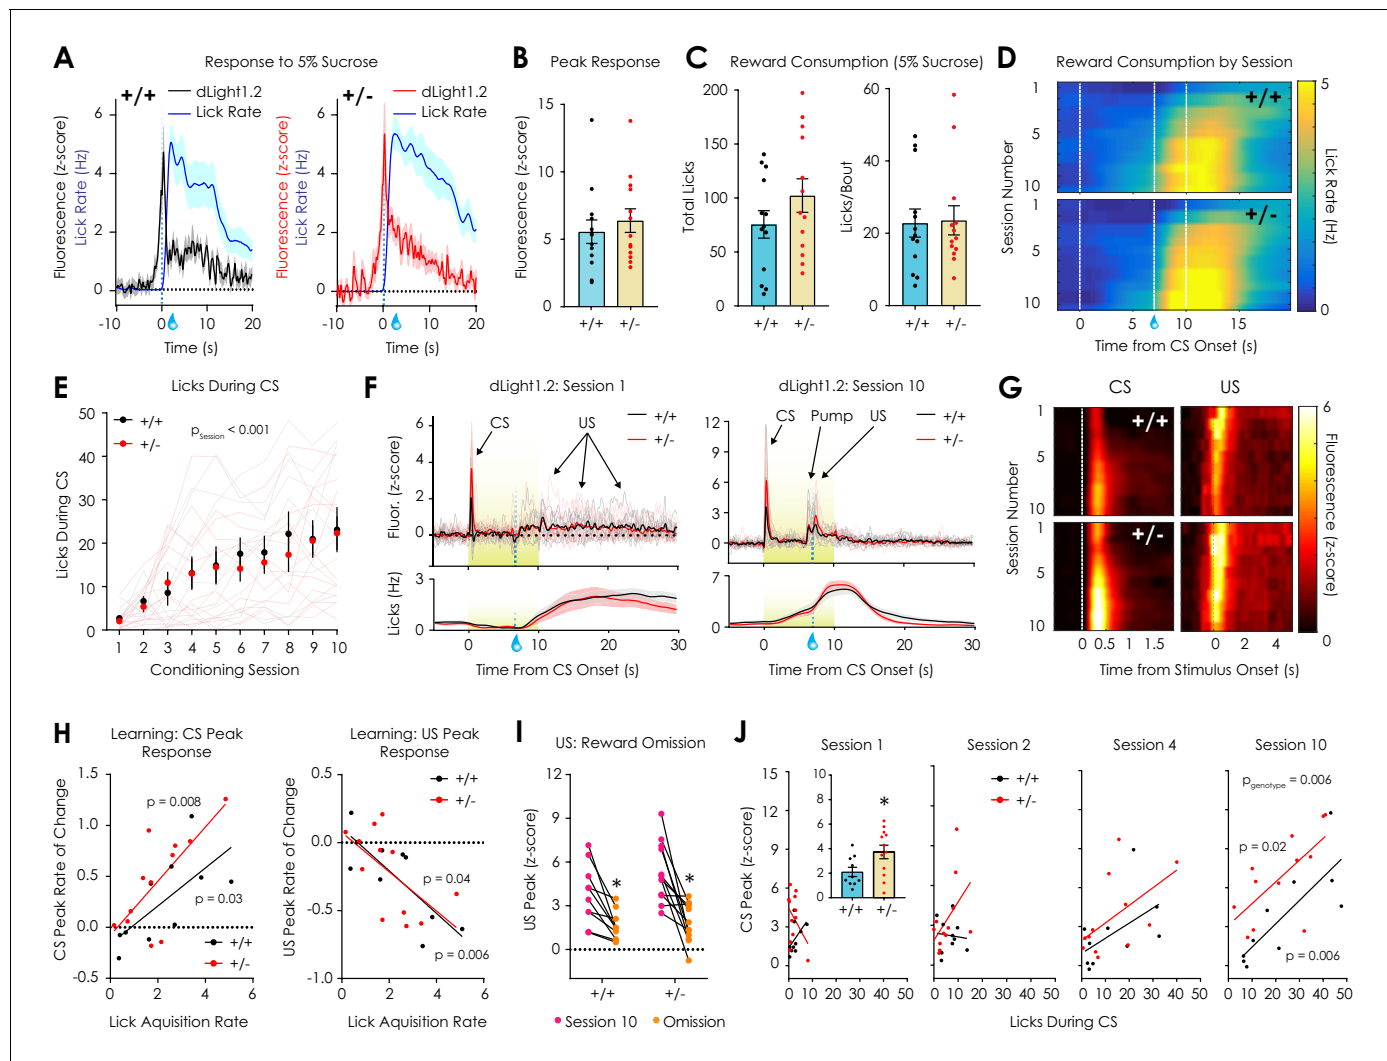

**Figure 4.** In vivo optical monitoring of dopamine dynamics during reward consumption and Pavlovian conditioning. (A) Consumption of 5% sucrose evoked robust, time-locked fluorescent dopamine transients in both  $Nf1^{+/+}$  (left) and  $Nf1^{+/-}$  mice (right). (B) Peak dLight1.2 responses to the onset of sucrose consumption ( $n_{+/+} = 13$ ,  $n_{+/-} = 13$ ; unpaired t-test;  $t_{24} = 0.66$ ,  $p = 0.51$ ). (C) No difference in total number of licks (left;  $t_{24} = 1.33$ ,  $p = 0.20$ ) or licks per bout (right;  $t_{24} = 0.14$ ,  $p = 0.89$ ) were observed between genotypes. (D) Average session-by-session reward seeking during Pavlovian conditioning; the unconditioned stimulus (US, 5% sucrose) was delivered 7 s after the onset of a reward-predictive 10 s conditioned stimulus (CS, 5 kHz tone with house light illumination). (E)  $Nf1^{+/+}$  ( $n = 10$ ) and  $Nf1^{+/-}$  ( $n = 12$ ) mice displayed learned licking during the CS that was not dependent on genotype (two-way repeated measures ANOVA;  $F_{9,180} = 0.48$ ,  $p_{\text{genotype} \times \text{session}} = 0.89$ ;  $F_{9,180} = 21.36$ ,  $p_{\text{session}} < 0.001$ ;  $F_{1,20} = 0.09$ ,  $p_{\text{genotype}} = 0.77$ ). (F) Individual averaged dLight1.2 traces before (left, Session 1) and after (right, Session 10) learning showing CS, US, and pump responses. (G) Heatmap showing average dLight1.2 responses to the CS (left; two-way repeated measures ANOVA; peak response:  $F_{9,180} = 0.81$ ,  $p_{\text{genotype} \times \text{session}} = 0.61$ ) or US (right; peak response:  $F_{9,180} = 0.49$ ,  $p_{\text{genotype} \times \text{session}} = 0.88$ ) across training sessions. (H) Across sessions, the rate of acquisition of licking during the CS was correlated with the rate of change of the CS ( $Nf1^{+/+}$ :  $R^2 = 0.48$ ,  $p = 0.03$ ;  $Nf1^{+/-}$ :  $R^2 = 0.52$ ,  $p = 0.008$ ) and US peak ( $Nf1^{+/+}$ :  $R^2 = 0.63$ ,  $p = 0.006$ ;  $Nf1^{+/-}$ :  $R^2 = 0.36$ ,  $p = 0.03$ ) in both genotypes. (I) Unexpected omission resulted in a significant reduction in US magnitude in both  $Nf1^{+/+}$  ( $n = 10$ ; paired t-test;  $t_9 = 4.03$ ,  $p = 0.003$ ) and  $Nf1^{+/-}$  mice ( $n = 12$ ; paired t-test;  $t_{11} = 4.50$ ,  $p < 0.001$ ). (J) Correlation between CS peak response and CS licking during session 1 ( $Nf1^{+/+}$ :  $R^2 = 0.25$ ,  $p = 0.14$ ;  $Nf1^{+/-}$ :  $R^2 = 0.16$ ,  $p = 0.21$ ;  $p_{\text{genotype}} = 0.04$ ; inset: average peak; unpaired t-test;  $t_{20} = 2.34$ ,  $p = 0.03$ ), session 2 ( $Nf1^{+/+}$ :  $R^2 = 0.008$ ,  $p = 0.80$ ;  $Nf1^{+/-}$ :  $R^2 = 0.22$ ,  $p = 0.12$ ;  $p_{\text{genotype}} = 0.14$ ), session 4 ( $Nf1^{+/+}$ :  $R^2 = 0.28$ ,  $p = 0.12$ ;  $Nf1^{+/-}$ :  $R^2 = 0.30$ ,  $p = 0.07$ ;  $p_{\text{genotype}} = 0.26$ ), and session 10 ( $Nf1^{+/+}$ :  $R^2 = 0.63$ ,  $p = 0.006$ ;  $Nf1^{+/-}$ :  $R^2 = 0.46$ ,  $p = 0.02$ ;  $p_{\text{genotype}} = 0.006$ ). \* denotes  $p < 0.05$ . Data presented as mean  $\pm$  SEM.

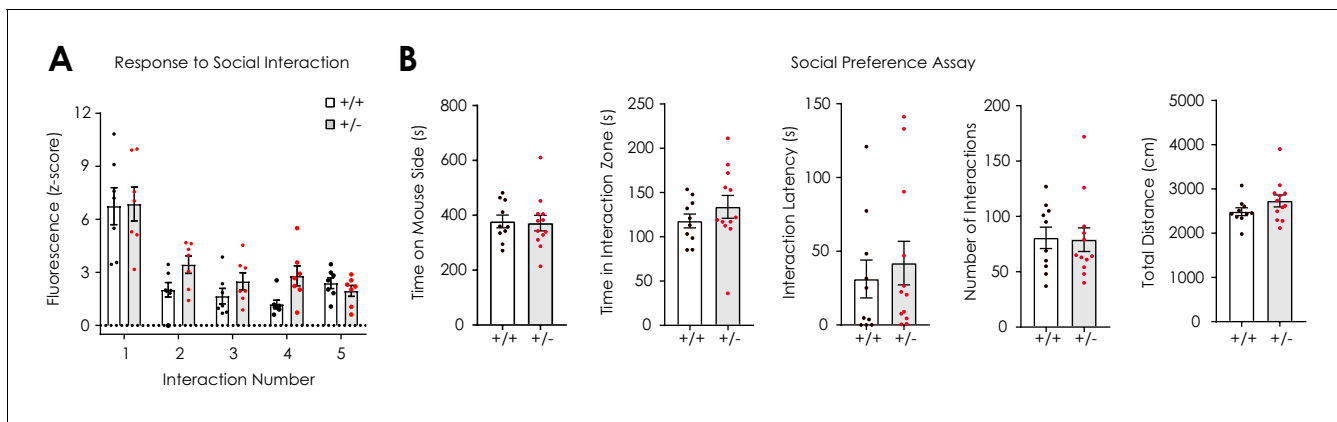

**Figure 4—figure supplement 1.** dLight1.2 responses to social interaction and measurement of social preference. **(A)** dLight1.2 responses to the onset of social interaction decremented from bout to bout ( $n_{+/+} = 7$ ;  $n_{+/-} = 7$ ; 2-way repeated measures ANOVA;  $F_{4,48} = 24.3$ ,  $p_{\text{trial}} < 0.001$ ) and did not depend on genotype ( $F_{4,48} = 1.08$ ,  $p_{\text{genotype} \times \text{trial}} = 0.38$ ;  $F_{1,12} = 4.21$ ,  $p_{\text{genotype}} = 0.06$ ). **(B)** No differences in time on the mouse-paired side (unpaired t-test;  $t_{20} = 0.16$ ,  $p = 0.87$ ), time in the interaction zone ( $t_{20} = 1.01$ ,  $p = 0.33$ ), interaction latency ( $t_{20} = 0.54$ ,  $p = 0.60$ ), number of social interactions ( $t_{20} = 0.12$ ,  $p = 0.91$ ), or total distance traveled ( $t_{20} = 1.44$ ,  $p = 0.17$ ) was observed during a social preference assay between  $Nf1^{+/+}$  ( $n = 10$ ) and  $Nf1^{+/-}$  ( $n = 12$ ) mice. Data presented as mean  $\pm$  SEM.

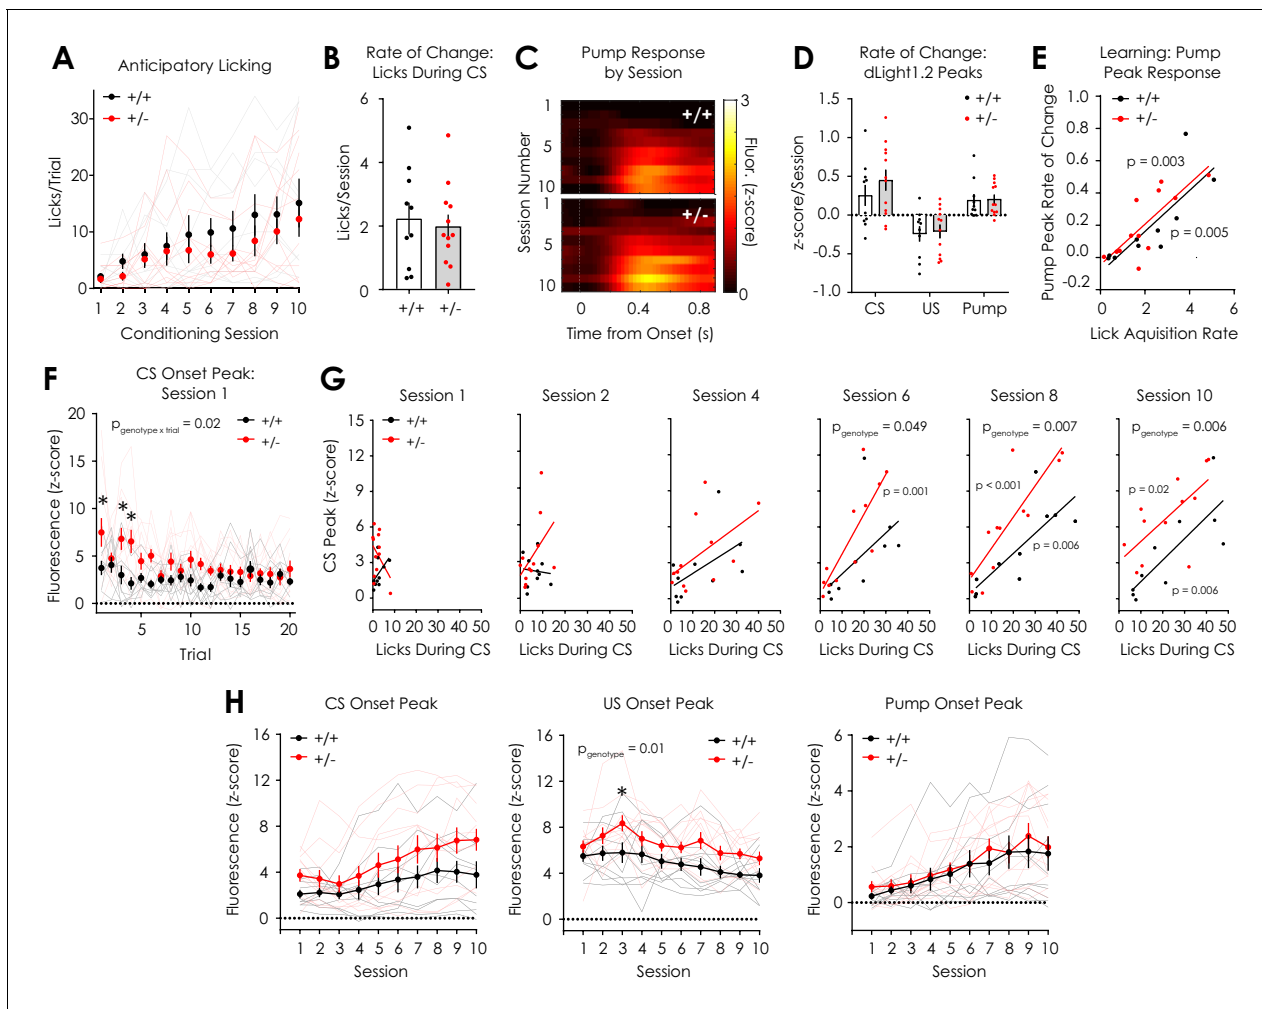

**Figure 4—figure supplement 2.** Additional data: Pavlovian conditioning. (A) Anticipatory licking across conditioning sessions ( $F_{9,180} = 0.39$ ,  $p_{\text{genotype} \times \text{session}} = 0.94$ ;  $F_{9,180} = 9.06$ ,  $p_{\text{session}} < 0.001$ ;  $F_{1,20} = 1.02$ ,  $p_{\text{genotype}} = 0.32$ ) in  $Nf1^{+/+}$  and  $Nf1^{+/-}$  mice ( $n_{+/+} = 10$ ,  $n_{+/-} = 12$ ). (B) No difference in the slope of the linear fit of CS licking across sessions (i.e. the lick acquisition rate) was observed between genotypes during the Pavlovian conditioning task ( $n_{+/+} = 10$ ,  $n_{+/-} = 12$ ; unpaired t-test;  $t_{20} = 0.23$ ,  $p = 0.82$ ). (C) Heatmap showing dLight1.2 responses to the sound of the sucrose delivery pump by session. (D) No difference between genotypes was observed in the rate of change of the CS (multiple t-tests;  $t_{20} = 1.00$ ,  $q = 0.93$ ), US ( $t_{20} = 0.24$ ,  $q = 0.93$ ), and pump ( $t_{20} = 0.14$ ,  $q = 0.93$ ) peak responses. (E) The rate of change of peak pump responses was correlated with lick acquisition rate in both  $Nf1^{+/+}$  ( $R^2 = 0.64$ ,  $p = 0.005$ ) and  $Nf1^{+/-}$  ( $R^2 = 0.61$ ,  $p = 0.003$ ) mice independent of genotype ( $p_{\text{genotype}} = 0.47$ ). (F) Peak dLight1.2 responses to CS onset during session one decreased on a trial-by-trial basis ( $n_{+/+} = 10$ ,  $n_{+/-} = 12$ ; 2-way repeated measures ANOVA with Bonferroni post hoc tests;  $F_{19,380} = 3.07$ ,  $p_{\text{trial}} < 0.001$ ) and was greater in  $Nf1^{+/-}$  mice ( $F_{19,380} = 2.24$ ,  $p_{\text{genotype} \times \text{trial}} = 0.002$ ;  $F_{1,20} = 6.24$ ,  $p_{\text{genotype}} = 0.02$ ). (G) Correlation between CS peak response and CS licking during session 1 ( $Nf1^{+/+}$ :  $R^2 = 0.25$ ,  $p = 0.14$ ;  $Nf1^{+/-}$ :  $R^2 = 0.16$ ,  $p = 0.21$ ;  $p_{\text{genotype}} = 0.04$ ), session 2 ( $Nf1^{+/+}$ :  $R^2 = 0.008$ ,  $p = 0.80$ ;  $Nf1^{+/-}$ :  $R^2 = 0.22$ ,  $p = 0.12$ ;  $p_{\text{genotype}} = 0.14$ ), session 4 ( $Nf1^{+/+}$ :  $R^2 = 0.28$ ,  $p = 0.12$ ;  $Nf1^{+/-}$ :  $R^2 = 0.29$ ,  $p = 0.07$ ;  $p_{\text{genotype}} = 0.27$ ), session 6 ( $Nf1^{+/+}$ :  $R^2 = 0.32$ ,  $p = 0.09$ ;  $Nf1^{+/-}$ :  $R^2 = 0.68$ ,  $p = 0.001$ ;  $p_{\text{genotype}} = 0.049$ ), session 8 ( $Nf1^{+/+}$ :  $R^2 = 0.63$ ,  $p = 0.006$ ;  $Nf1^{+/-}$ :  $R^2 = 0.74$ ,  $p < 0.001$ ;  $p_{\text{genotype}} = 0.007$ ), and session 10 ( $Nf1^{+/+}$ :  $R^2 = 0.63$ ,  $p = 0.006$ ;  $Nf1^{+/-}$ :  $R^2 = 0.46$ ,  $p = 0.02$ ;  $p_{\text{genotype}} = 0.006$ ). (H) Peak responses to CS (two-way repeated measures ANOVA with Bonferroni post hoc tests;  $F_{9,180} = 0.81$ ,  $p_{\text{genotype} \times \text{session}} = 0.61$ ;  $F_{9,180} = 8.47$ ,  $p_{\text{session}} < 0.001$ ;  $F_{1,20} = 2.55$ ,  $p_{\text{genotype}} = 0.13$ ), US ( $F_{9,180} = 0.50$ ,  $p_{\text{genotype} \times \text{session}} = 0.87$ ;  $F_{9,180} = 5.28$ ,  $p_{\text{session}} < 0.001$ ;  $F_{1,20} = 7.23$ ,  $p_{\text{genotype}} = 0.01$ ), and the sucrose delivery pump ( $F_{9,180} = 0.30$ ,  $p_{\text{genotype} \times \text{session}} = 0.97$ ;  $F_{9,180} = 11.73$ ,  $p_{\text{session}} < 0.001$ ;  $F_{1,20} = 0.28$ ,  $p_{\text{genotype}} = 0.28$ ) in  $Nf1^{+/+}$  and  $Nf1^{+/-}$  mice ( $n_{+/+} = 10$ ,  $n_{+/-} = 12$ ). \*denotes  $p < 0.05$ . Multiple t-tests were corrected with the two-stage linear step-up procedure of Benjamini, Krieger, and Yekutieli with a false discovery rate of 5%. Data presented as mean  $\pm$  SEM.

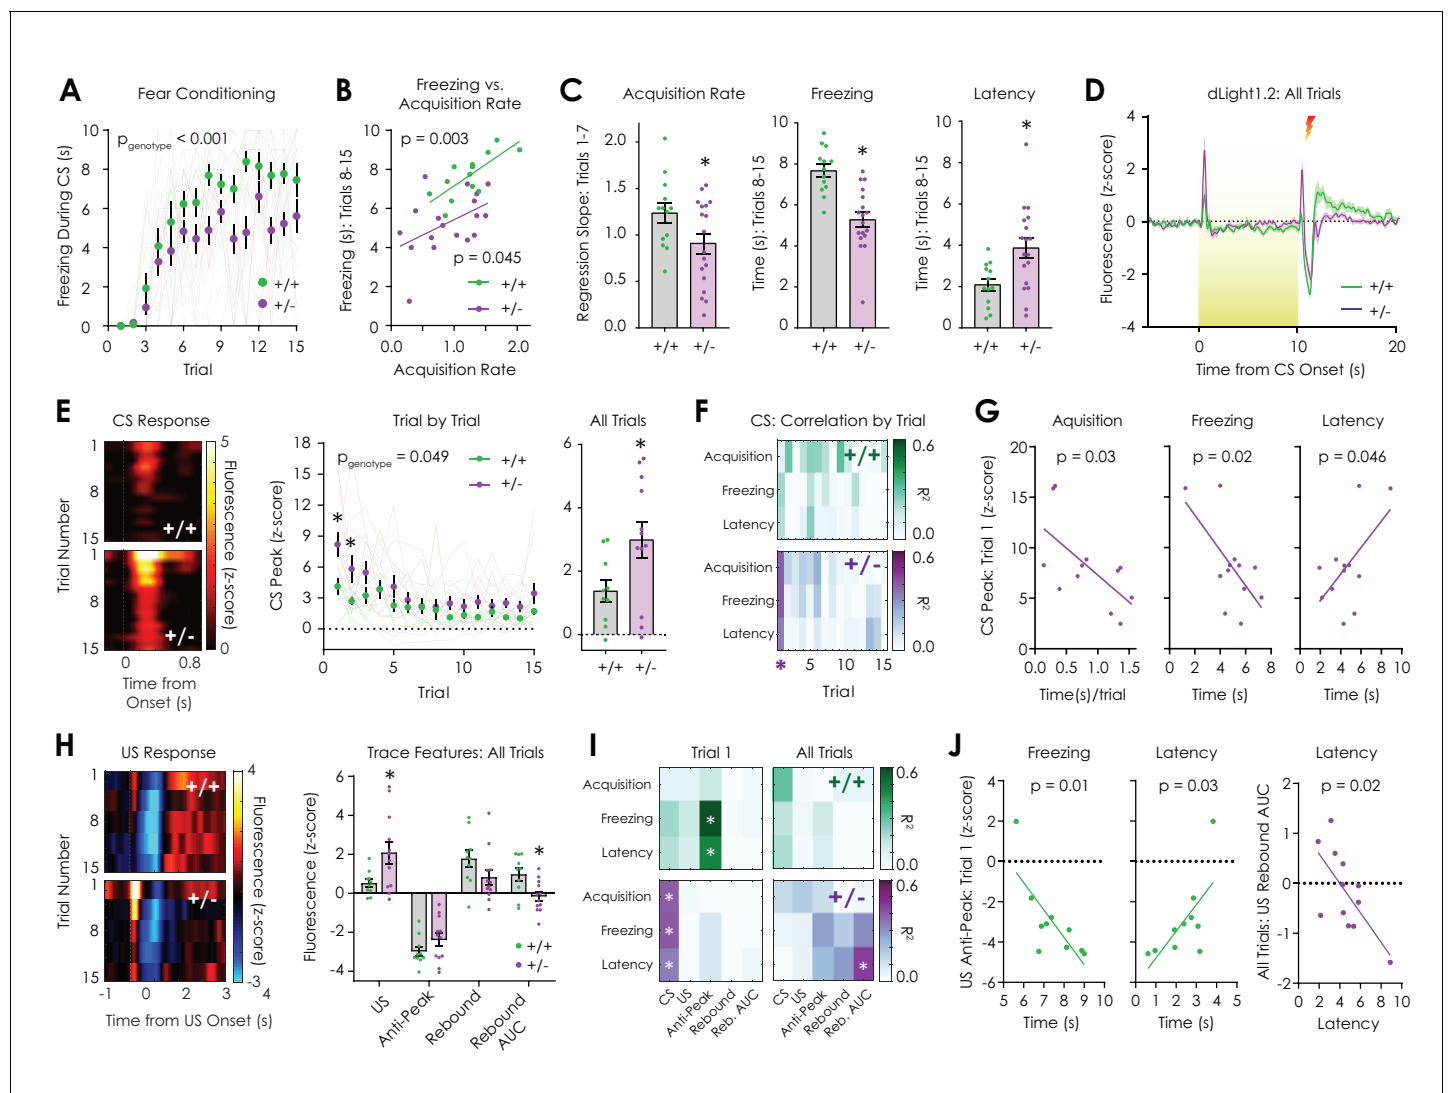

**Figure 5.** In vivo optical monitoring of dopamine dynamics during cued fear conditioning. (A) During the cued fear conditioning assay, mice displayed a trial-by-trial increase in freezing that was greater in  $Nf1^{+/+}$  mice but not dependent on genotype ( $n_{+/+} = 13$ ,  $n_{+/-} = 18$ ; 2-way repeated measures ANOVA;  $F_{14,406} = 1.321$ ,  $p_{\text{genotype} \times \text{trial}} = 0.19$ ;  $F_{14,406} = 28.56$ ,  $p_{\text{trial}} < 0.001$ ;  $F_{1,29} = 18.54$ ,  $p_{\text{genotype}} < 0.001$ ). (B) The freezing acquisition rate during trials 1–7 was correlated with freezing during trials 8–15 in both  $Nf1^{+/+}$  ( $n = 13$ ;  $R^2 = 0.56$ ,  $p = 0.003$ ) and  $Nf1^{+/-}$  mice ( $n = 18$ ;  $R^2 = 0.23$ ,  $p = 0.045$ ). (C) The freezing acquisition rate (left; unpaired t-test;  $t_{29} = 2.08$ ,  $p = 0.046$ ) and average freezing during trials 8–15 (middle;  $t_{29} = 4.79$ ,  $p < 0.001$ ) were decreased in  $Nf1^{+/-}$  mice due to increased latency to freeze (right;  $t_{29} = 2.90$ ,  $p = 0.007$ ). (D) Averaged dLight1.2 traces showing responses to CS (10 s, 3 kHz tone with house light illumination) presentation and US (1 s, 0.4 mA shock) delivery. (E) Heatmaps showing trial-by-trial changes in dLight1.2 signal in response to the CS (left).  $Nf1^{+/-}$  mice ( $n = 12$ ) displayed increased CS responses across trials (middle; two-way repeated measures ANOVA;  $F_{14,280} = 1.662$ ,  $p_{\text{genotype} \times \text{trial}} = 0.06$ ;  $F_{14,280} = 9.30$ ,  $p_{\text{trial}} < 0.001$ ;  $F_{1,20} = 4.37$ ,  $p_{\text{genotype}} = 0.049$ ) and when traces were averaged (right; unpaired t-test;  $t_{20} = 2.324$ ,  $p = 0.03$ ) compared to  $Nf1^{+/+}$  mice ( $n = 10$ ). (F) Correlation matrix showing trial-by-trial correlation strength between behavioral measures and CS peak response. (G) In  $Nf1^{+/-}$  mice, there were significant correlations between the CS peak in trial one and the freezing acquisition rate ( $R^2 = 0.40$ ,  $p = 0.03$ ), time spent freezing ( $R^2 = 0.41$ ,  $p = 0.02$ ), and the latency to freeze ( $R^2 = 0.34$ ,  $p = 0.046$ ). (H) Heatmaps showing trial-by-trial changes in dLight1.2 signal in response to US delivery (left).  $Nf1^{+/-}$  mice ( $n = 12$ ) exhibited increased average peak responses (right) to US onset ( $t_{20} = 2.50$ ,  $q = 0.04$ ) and decreased integrated post-US rebound (area under the curve or AUC;  $t_{20} = 2.85$ ,  $q = 0.03$ ) compared to  $Nf1^{+/+}$  mice ( $n = 10$ ). (I) Correlation matrices displaying strength of US feature peak-behavior correlations during trial one and across trials. (J) There were significant correlations between the US anti-peak magnitude in trial one and freezing ( $R^2 = 0.58$ ,  $p = 0.01$ ) or the latency to freeze ( $R^2 = 0.46$ ,  $p = 0.03$ ) in  $Nf1^{+/+}$  mice and the integrated post-US rebound across all trials and the latency to freeze ( $R^2 = 0.45$ ,  $p = 0.02$ ) in  $Nf1^{+/-}$  mice. \*denotes  $p < 0.05$ . Multiple t-tests were corrected with the two-stage linear step-up procedure of Benjamini, Krieger, and Yekutieli with a false discovery rate of 5%. Data presented as mean  $\pm$  SEM.

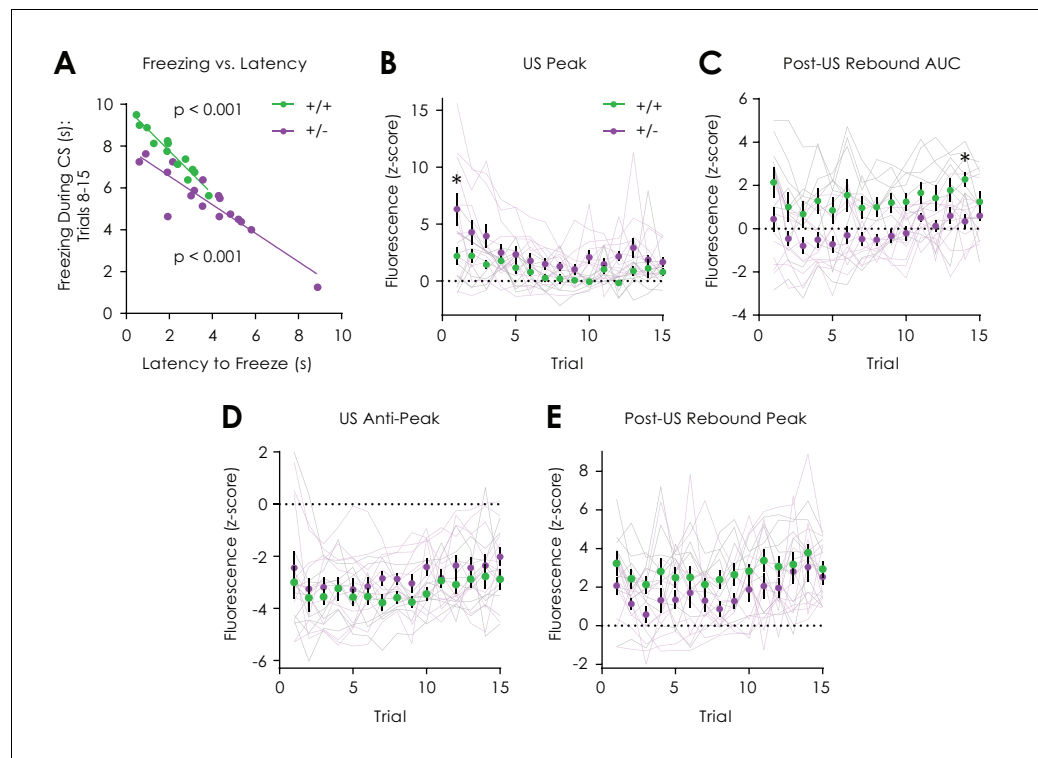

**Figure 5—figure supplement 1.** Additional data: Cued fear conditioning. (A) The latency to freeze during trials was correlated with freezing during trials 8–15 in both *Nf1*<sup>+/+</sup> (*n* = 13;  $R^2 = 0.93$ ,  $p < 0.001$ ) and *Nf1*<sup>+/-</sup> mice (*n* = 18;  $R^2 = 0.82$ ,  $p < 0.001$ ). (B) *Nf1*<sup>+/-</sup> mice (*n* = 12) displayed increased US responses across trials (two-way repeated measures ANOVA with Bonferroni post hoc tests;  $F_{14,280} = 1.83$ ,  $p_{\text{genotype} \times \text{trial}} = 0.03$ ;  $F_{14,280} = 8.23$ ,  $p_{\text{trial}} < 0.001$ ;  $F_{1,20} = 6.59$ ,  $p_{\text{genotype}} = 0.02$ ) when compared to *Nf1*<sup>+/+</sup> littermates. (C) The post-US rebound area under the curve (AUC) was greater in *Nf1*<sup>+/-</sup> mice ( $F_{1,20} = 8.98$ ,  $p_{\text{genotype}} = 0.007$ ) independent of trial ( $F_{14,280} = 0.59$ ,  $p_{\text{genotype} \times \text{trial}} = 0.87$ ;  $F_{14,280} = 4.63$ ,  $p_{\text{trial}} < 0.001$ ) when compared to *Nf1*<sup>+/+</sup> littermates. (D) No differences in the US anti-peak ( $F_{14,280} = 0.71$ ,  $p_{\text{genotype} \times \text{trial}} = 0.77$ ;  $F_{14,280} = 3.78$ ,  $p_{\text{trial}} < 0.001$ ;  $F_{1,20} = 1.50$ ,  $p_{\text{genotype}} = 0.24$ ) or (E) post-US rebound peak ( $F_{14,280} = 0.50$ ,  $p_{\text{genotype} \times \text{trial}} = 0.93$ ;  $F_{14,280} = 4.50$ ,  $p_{\text{trial}} < 0.001$ ;  $F_{1,20} = 3.51$ ,  $p_{\text{genotype}} = 0.08$ ) were observed between genotypes. \*denotes  $p < 0.05$ . Data presented as mean  $\pm$  SEM.

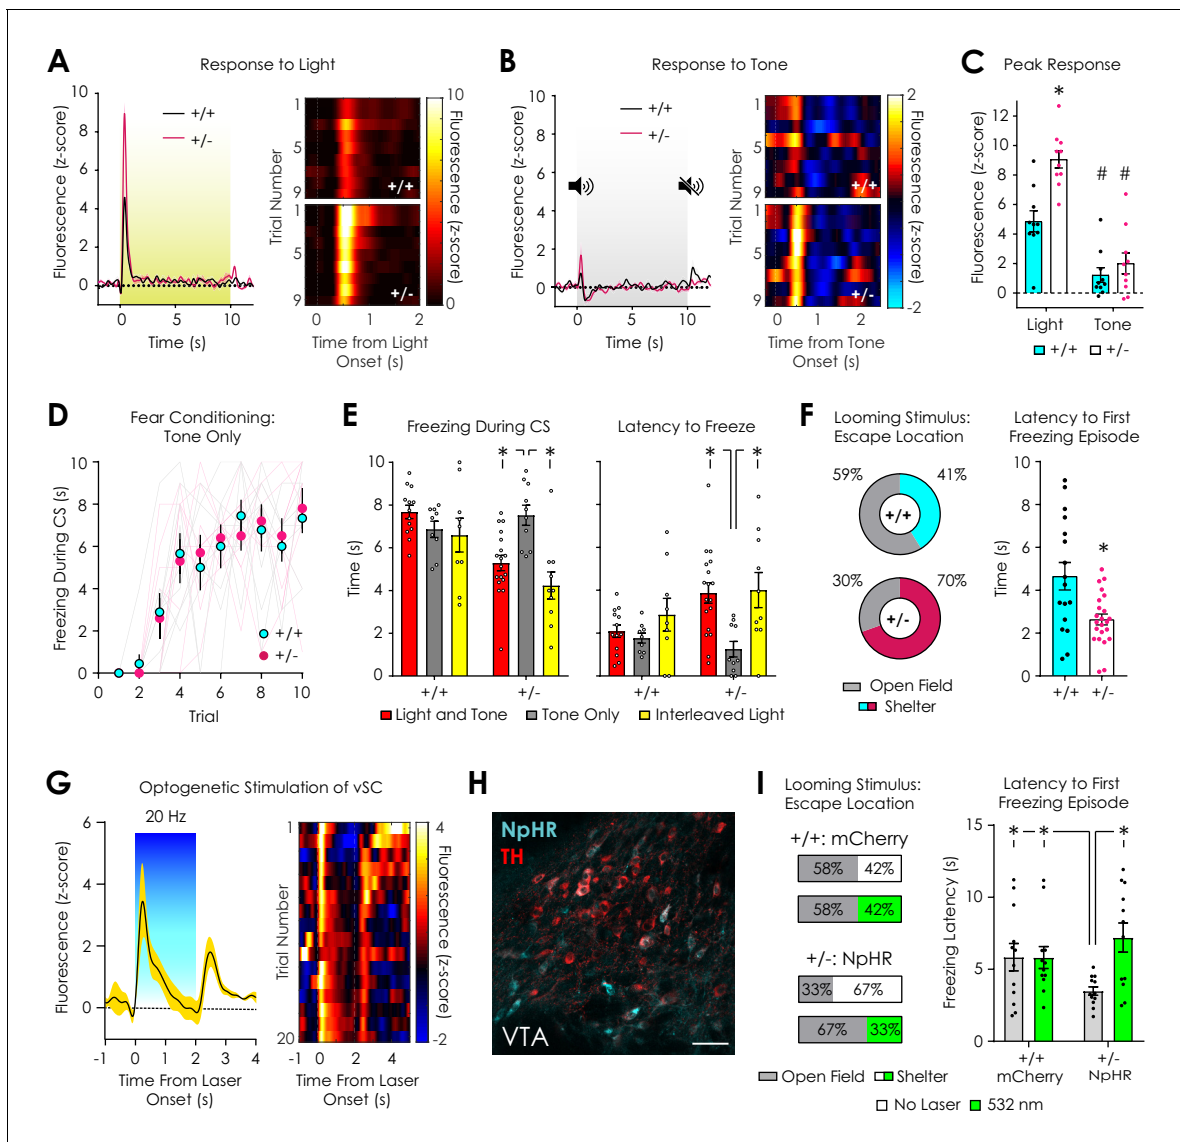

**Figure 6.** Dopaminergic and behavioral responses to salient visual stimuli. (A) Average (left) and trial-by-trial (right) fluorescent dopamine response to a 10 s overhead light stimulus. (B) Average (left) and trial-by-trial (right) fluorescent dopamine response to a 10 s auditory stimulus (5 kHz tone). (C)  $Nf1^{+/-}$  mice had greater peak responses to light ( $p < 0.001$ ) but not tone onset ( $p > 0.99$ ) compared to  $Nf1^{+/+}$  mice ( $n_{+/+} = 10$ ,  $n_{+/-} = 10$ ; two-way ANOVA with Bonferroni post hoc tests;  $F_{1,36} = 7.27$ ,  $p_{\text{genotype} \times \text{condition}} = 0.01$ ;  $F_{1,36} = 15.48$ ,  $p_{\text{genotype}} < 0.001$ ). In both genotypes, responses to light were greater than responses to tone ( $F_{1,36} = 71.02$ ,  $p_{\text{stimulus}} < 0.001$ ;  $p_{+/+} = 0.002$ ,  $p_{+/-} < 0.001$ ). (D) No difference in cued fear conditioning was observed when a tone-only CS was used ( $n_{+/+} = 9$ ,  $n_{+/-} = 10$ ; two-way repeated measures ANOVA;  $F_{9,153} = 0.26$ ,  $p_{\text{genotype} \times \text{trial}} = 0.98$ ). (E)  $Nf1^{+/-}$  mice exhibited increased freezing (left) and decreased latency to freeze (right) in tone-only CS trials ( $n = 10$ ) compared to light and tone ( $n = 18$ ; unpaired t-test; freezing:  $t_{26} = 3.75$ ,  $p < 0.001$ ; latency:  $t_{26} = 3.75$ ,  $p < 0.001$ ) or interleaved light trials ( $n = 10$ ; paired t-test; freezing:  $t_9 = 5.30$ ,  $p < 0.001$ ; latency:  $t_9 = 3.48$ ,  $p = 0.007$ ). No differences in freezing or latency to freeze was observed between tone-only CS trials ( $n = 9$ ) and light and tone ( $n = 13$ ; unpaired t-test; freezing:  $t_{20} = 1.66$ ,  $p = 0.11$ ; latency:  $t_{20} = 0.81$ ,  $p = 0.43$ ) or interleaved light trials ( $n = 10$ ; paired t-test; freezing:  $t_8 = 0.42$ ,  $p = 0.69$ ; latency:  $t_8 = 1.49$ ,  $p = 0.19$ ) in  $Nf1^{+/+}$  mice. (F)  $Nf1^{+/+}$  ( $n = 17$ ) and  $Nf1^{+/-}$  mice ( $n = 23$ ) had similar reaction times to a looming stimulus (left;  $t_{38} = 0.79$ ,  $p = 0.43$ ), yet  $Nf1^{+/+}$  mice were more likely to escape to the shelter after stimulus presentation (left) and exhibited shorter latency to the first freezing episode after looming onset than  $Nf1^{+/-}$  mice ( $t_{38} = 3.24$ ,  $p = 0.003$ ). (G) Optogenetic stimulation of the ventral superior colliculus (vSC) produced time-locked dopamine release in the LNAc ( $n = 3$  mice; average trace, left; trial-by-trial response, right). (H) Representative confocal image showing tyrosine hydroxylase (TH)-positive dopaminergic and Th-Off-NpHR-eYFP neurons in the VTA (scale: 50  $\mu$ m). (I) In the absence of photoinhibition, VTA  $Th\text{-Off-NpHR-eYFP}$   $Nf1^{+/-}$  mice ( $n = 12$ ) were more likely to escape to the shelter (left) and had shorter latency to the first freezing episode (right; unpaired t-test;  $t_{22} = 2.36$ ,  $p = 0.03$ ) compared with VTA  $Th\text{-Off-mCherry}$   $Nf1^{+/+}$  mice ( $n = 12$ ). Optogenetic inhibition of VTA  $Th\text{-Off-NpHR-eYFP}$  neurons with 532 nm light (5 mW, 30 Hz, 20 ms pulse width) decreased the probability of escape to the shelter (left) and increased the latency to the first freezing episode (right; paired t-test;  $t_{11} = 3.82$ ,  $p = 0.003$ ) in VTA  $Th\text{-Off-NpHR-eYFP}$   $Nf1^{+/-}$  mice to levels that were similar to VTA  $Th\text{-Off-mCherry}$   $Nf1^{+/+}$  mice (unpaired t-test;  $Nf1^{+/-}$  Laser On vs  $Nf1^{+/+}$  Laser Off:  $t_{22} = 0.98$ ,  $p = 0.34$ ;

Figure 6 continued on next page

## Figure 6 continued

*Nf1*<sup>+/-</sup> Laser On vs *Nf1*<sup>+/+</sup> Laser On:  $t_{22} = 1.09$ ,  $p=0.29$ ). No difference was observed in VTA<sup>Th-Off-mCherry</sup> *Nf1*<sup>+/+</sup> mice between stimulation conditions (paired t-test;  $t_{11} = 0.02$ ,  $p=0.99$ ). \*denotes  $p<0.05$ . # denotes  $p<0.05$  vs light stimulus (panel C). Data presented as mean  $\pm$  SEM.

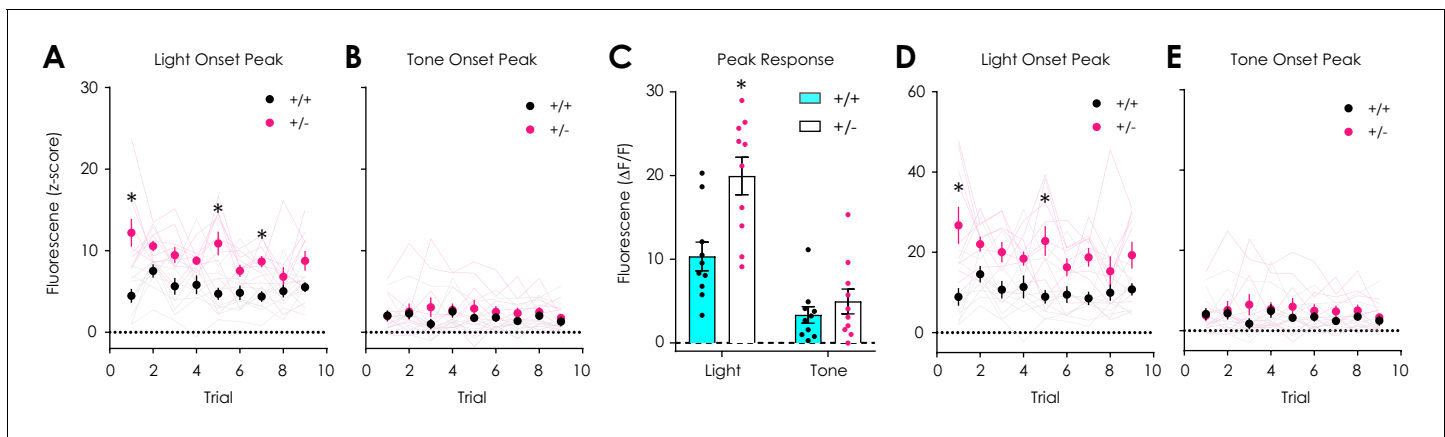

**Figure 6—figure supplement 1.** Additional data: dLight1.2 responses to auditory and visual stimuli. (A) dLight1.2 peak responses (z-scored) to overhead light onset were greater in *Nf1*<sup>+/-</sup> mice (*n* = 10) versus *Nf1*<sup>+/+</sup> littermates (*n* = 10) across trials (*n*<sub>+/+</sub> = 10, *n*<sub>+/-</sub> = 10; two-way repeated measures ANOVA with Bonferroni post hoc tests;  $F_{8,144} = 2.78$ ,  $p_{\text{genotype} \times \text{trial}} = 0.007$ ). (B) No differences in dLight1.2 responses (z-scored) to 60 dB tone were observed across trials ( $F_{8,144} = 0.92$ ,  $p_{\text{genotype} \times \text{trial}} = 0.50$ ). (C) *Nf1*<sup>+/-</sup> mice (*n* = 10) had greater peak responses ( $\Delta F/F$ ) to overhead light (multiple t-tests;  $t_{18} = 3.41$ ,  $q = 0.003$ ) but not tone onset ( $t_{18} = 0.90$ ,  $q = 0.19$ ) compared to *Nf1*<sup>+/+</sup> mice (*n* = 10). (D) dLight1.2 peak responses ( $\Delta F/F$ ) to overhead light onset were greater in *Nf1*<sup>+/-</sup> mice (*n* = 10) versus *Nf1*<sup>+/+</sup> littermates (*n* = 10) across trials (*n*<sub>+/+</sub> = 10, *n*<sub>+/-</sub> = 10; two-way repeated measures ANOVA with Bonferroni post hoc tests;  $F_{8,144} = 2.45$ ,  $p_{\text{genotype} \times \text{trial}} = 0.02$ ). (E) No differences in dLight1.2 responses ( $\Delta F/F$ ) to 60 dB tone were observed across trials ( $F_{8,144} = 1.15$ ,  $p_{\text{genotype} \times \text{trial}} = 0.33$ ). Multiple t-tests were corrected with the two-stage linear step-up procedure of Benjamini, Krieger and Yekutieli with a false discovery rate of 5%. \*denotes  $p < 0.05$ . Data presented as mean  $\pm$  SEM.

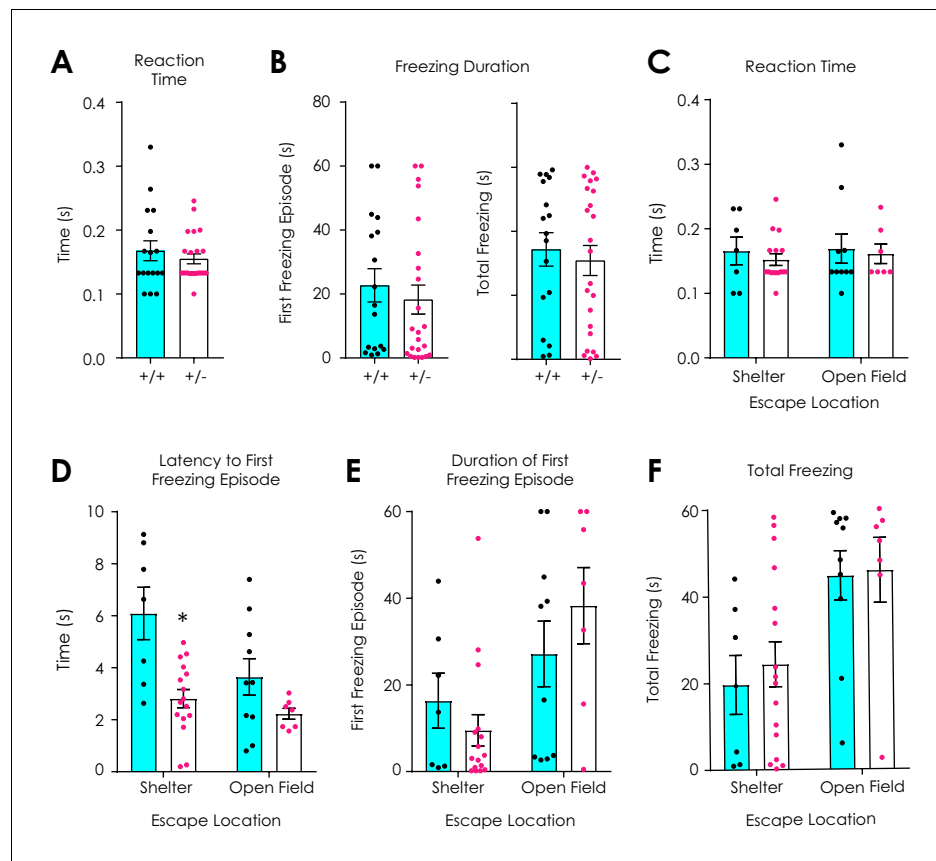

**Figure 6—figure supplement 2.** Additional data: Looming stimulus assay. (A) *Nf1*<sup>+/+</sup> ( $n = 17$ ) and *Nf1*<sup>+/-</sup> mice ( $n = 23$ ) have similar reaction times to a looming stimulus ( $t_{38} = 0.79$ ,  $p = 0.43$ ). (B) No difference in the duration of the first freezing episode (left;  $t_{38} = 0.64$ ,  $p = 0.53$ ) or total freezing during the first minute after looming (right;  $t_{38} = 0.49$ ,  $p = 0.62$ ) was observed. (C) Reaction time to a looming stimulus did not depend on escape location ( $n_{+/+ \text{ shelter}} = 7$ ,  $n_{+/+ \text{ open field}} = 10$ ,  $n_{+/- \text{ shelter}} = 16$ ,  $n_{+/- \text{ open field}} = 7$ ; two-way ANOVA with Bonferroni post hoc tests;  $F_{1,36} = 0.03$ ,  $p_{\text{genotype} \times \text{location}} = 0.87$ ;  $F_{1,36} = 0.13$ ,  $p_{\text{location}} = 0.72$ ;  $F_{1,36} = 0.38$ ,  $p_{\text{genotype}} = 0.54$ ). (D) The latency to the first freezing episode was shorter in *Nf1*<sup>+/-</sup> mice ( $F_{1,36} = 15.0$ ,  $p_{\text{genotype}} < 0.001$ ) and independent of freezing location ( $F_{1,36} = 2.35$ ,  $p_{\text{genotype} \times \text{location}} = 0.13$ ), although a significant main effect of location was observed ( $F_{1,36} = 6.22$ ,  $p_{\text{location}} = 0.02$ ). (E) The duration of first freezing episode ( $F_{1,36} = 1.95$ ,  $p_{\text{genotype} \times \text{location}} = 0.17$ ;  $F_{1,36} = 9.51$ ,  $p_{\text{location}} = 0.004$ ;  $F_{1,36} = 0.11$ ,  $p_{\text{genotype}} = 0.74$ ) and (F) the total time spent freezing during the first minute after looming ( $F_{1,36} = 0.07$ ,  $p_{\text{genotype} \times \text{location}} = 0.79$ ;  $F_{1,36} = 12.68$ ,  $p_{\text{location}} = 0.001$ ;  $F_{1,36} = 0.20$ ,  $p_{\text{genotype}} = 0.66$ ) were significantly influenced by freezing location independent of genotype. \*denotes  $p < 0.05$ . Data presented as mean ± SEM.

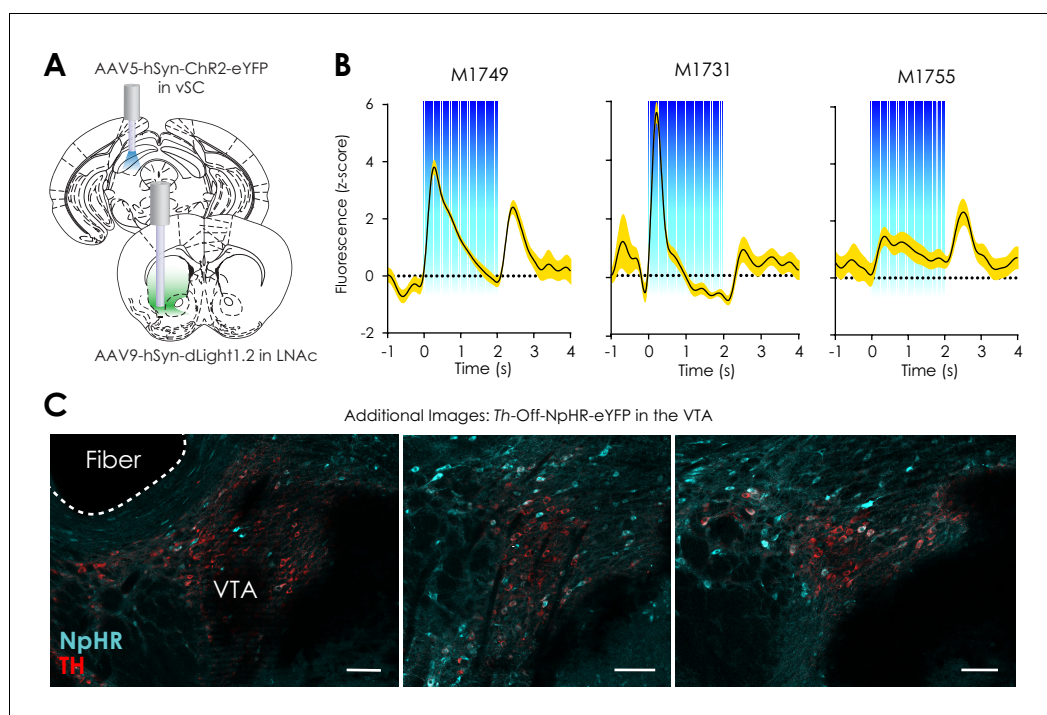

**Figure 6—figure supplement 3.** Additional data: Optogenetic control of the vSC and VTA<sup>non-Th</sup> neurons. (A) Illustration showing location of stereotaxic injection of the AAV5-hSyn-ChR2-eYFP viral vector and optical fiber in the ventral superior colliculus (vSC), as well as the location of the stereotaxic injection of the AAV9-hSyn-dLight1.2 viral vector and photometry fiber implantation in the LNAc. (B) Average fluorescence trace from individual mice showing optical LNAc dopamine signals evoked by activation of ChR2 in the ipsilateral vSC via two seconds of 20 Hz, 5 mW, 5 ms pulse-width, 473 nm laser stimulation. (C) Additional images showing *Th*-Off-NpHR-eYFP (cyan) and tyrosine hydroxylase (red)-labeled neurons in the VTA (scale = 50  $\mu$ m).
