# Supplementary material for: Optical dopamine monitoring with dLight1 reveals mesolimbic phenotypes in a mouse model of neurofibromatosis type 1
Source: eLife. 2019 Sep 23;8:e48983. doi: 10.7554/eLife.48983 (PMC6819083; doi:10.7554/eLife.48983)
Supplement: Source data 1. [file elife-48983-data1.xlsx]

## Sheet: Histology
Histology
Midbrain TH Staining
Measure	Test	Stat	p	WT Mean, SEM, n	KO Mean, SEM, n
VTA Soma Size: Averege per mouse	Unpaired t-Test, Two-Tailed	t=4.647 df=30	<0.0001	246.8 ± 5.904, n=17	208.1 ± 5.804, n=15
VTA Soma Size: Cumulative Distribution	Two-Sample Kolmogorov–Smirnov Test	D = 0.1768	8.9804e-34	n = 2344	n = 2586
VTA Soma Size - Major Axis	Unpaired t-Test, Two-Tailed	t=6.064 df=30	<0.0001	24.76 ± 0.3034, n=17	22.23 ± 0.28, n=15
VTA Soma Size - Minor Axis	Unpaired t-Test, Two-Tailed	t=4.357 df=30	0.0001	15.09 ± 0.2655, n=17	13.5 ± 0.2456, n=15
VTA Soma Size - Aspect Ratio	Unpaired t-Test, Two-Tailed	t=0.1623 df=30	0.8722	1.646 ± 0.02484, n=17	1.651 ± 0.02204, n=15
VTA Cell Counts	Unpaired t-Test, Two-Tailed	t=0.1505 df=30	0.8814	315.5 ± 6.468, n=17	314 ± 7.984, n=15
VTA TH Expression	Unpaired t-Test, Two-Tailed	t=0.2543 df=30	0.8998	323.3 ± 6.882, n=17	320.8 ± 6.961, n=15
SNc Soma Size - Cross Sectional Area	Unpaired t-Test, Two-Tailed	t=1.627 df=17	0.1222	336.7 ± 10.54, n=10	313.7 ± 9.193, n=9
SNc Soma Size: Cumulative Distribution	Two-Sample Kolmogorov–Smirnov Test	D = 0.0422	0.2674	n = 1131	n = 1099
SNc Cell Counts	Unpaired t-Test, Two-Tailed	t=0.49 df=17	0.6304	257.8 ± 8.766, n=10	264.3 ± 10.14, n=9
SNc TH Expression	Unpaired t-Test, Two-Tailed	t=0.153 df=17	0.8802	244.8 ± 5.417, n=10	243.4 ± 7.079, n=9
Striatum Midbrain TH Staining
Region	Test	t-ratio	q	n	df	Notes
DMS	Multiple t-Tests	0.02887	>0.99	WT = 13; KO = 12	23	Two-stage linear step-up procedure of Benjamini, Krieger and Yekutieli, with Q = 5%
DLS	Multiple t-Tests	0.3105	>0.99	WT = 13; KO = 12	23	Two-stage linear step-up procedure of Benjamini, Krieger and Yekutieli, with Q = 5%
NAcS	Multiple t-Tests	1.061	0.875845	WT = 13; KO = 12	23	Two-stage linear step-up procedure of Benjamini, Krieger and Yekutieli, with Q = 5%
LNAc	Multiple t-Tests	0.9552	0.875845	WT = 13; KO = 12	23	Two-stage linear step-up procedure of Benjamini, Krieger and Yekutieli, with Q = 5%
NAcC	Multiple t-Tests	0.8264	0.875845	WT = 13; KO = 12	23	Two-stage linear step-up procedure of Benjamini, Krieger and Yekutieli, with Q = 5%
OT	Multiple t-Tests	0.2052	>0.99	WT = 13; KO = 12	23	Two-stage linear step-up procedure of Benjamini, Krieger and Yekutieli, with Q = 5%
VAST Sholl Analysis
Property	Statistical Test	Factor	Statistic	p	n
Sholl Analysis: WT vs KO	2-Way RM ANOVA	Interaction	F (80, 2160) = 0.05164	>0.9999	WT = 13; KO = 16
Sholl Analysis: WT vs KO	2-Way RM ANOVA	Distance	F (80, 2160) = 63.9	<0.0001	WT = 13; KO = 16
Sholl Analysis: WT vs KO	2-Way RM ANOVA	Genotype	F (1, 27) = 0.248	0.6225	WT = 13; KO = 16
Measure	Test	Stat	p	WT Mean, SEM, n	KO Mean, SEM, n
Total Neurite Length	Unpaired t-Test, Two-Tailed	t=0.1768 df=27	0.861	1284 ± 145, n=13	1320 ± 137.8, n=16

## Sheet: HPLC
HPLC: Monoamines and Metabolites
Measure	Statistical Test	t-ratio	q	n	df	Notes
NE	Multiple t-tests	0.1242	0.986907	WT = 11; KO = 16	25	Two-stage linear step-up procedure of Benjamini, Krieger and Yekutieli, with Q = 5%
DA	Multiple t-tests	0.7683	0.826006	WT = 11; KO = 16	25	Two-stage linear step-up procedure of Benjamini, Krieger and Yekutieli, with Q = 5%
DOPAC	Multiple t-tests	0.07614	0.986907	WT = 11; KO = 16	25	Two-stage linear step-up procedure of Benjamini, Krieger and Yekutieli, with Q = 5%
HVA	Multiple t-tests	0.5154	0.897879	WT = 11; KO = 16	25	Two-stage linear step-up procedure of Benjamini, Krieger and Yekutieli, with Q = 5%
3-MT	Multiple t-tests	2.442	0.16172	WT = 11; KO = 16	25	Two-stage linear step-up procedure of Benjamini, Krieger and Yekutieli, with Q = 5%
5-HT	Multiple t-tests	1.347	0.680126	WT = 11; KO = 16	25	Two-stage linear step-up procedure of Benjamini, Krieger and Yekutieli, with Q = 5%
5-HIAA	Multiple t-tests	1.11	0.680126	WT = 11; KO = 16	25	Two-stage linear step-up procedure of Benjamini, Krieger and Yekutieli, with Q = 5%

## Sheet: Patch Clamp Electrophysiology
Electrophysiology
Property	Experiment	Statistical Test	Statistic	p	WT Mean, SEM, n	KO Mean, SEM, n
Cm	Baseline Characterization	Unpaired t-Test, Two-Tailed	t=2.543 df=48	0.0143	47.35 ± 2.032, n=21	41.27 ± 2.026, n=29
Rm	Baseline Characterization	Unpaired t-Test, Two-Tailed	t=2.965 df=48	0.0047	172.4 ± 10.94, n=21	235.7 ± 16.32, n=29
Rs	Baseline Characterization	Unpaired t-Test, Two-Tailed	t=0.0431 df=48	0.9658	17.86 ± 1.73, n=21	17.95 ± 1.257, n=29
Holding	Baseline Characterization	Unpaired t-Test, Two-Tailed	t=0.4454 df=48	0.658	-74.26 ± 10.95, n=21	-81.01 ± 10.18, n=29
Rheobase	Baseline Characterization	Unpaired t-Test, Two-Tailed	t=4.054 df=48	0.0002	124.1 ± 8.65, n=21	171.7 ± 7.779, n=29
AP Threshold	Baseline Characterization	Unpaired t-Test, Two-Tailed	t=1.933 df=48	0.0591	-39.32 ± 1.266, n=21	-36.45 ± 0.8708, n=29
AP Duration	Baseline Characterization	Unpaired t-Test, Two-Tailed	t=0.394 df=48	0.6953	3.671 ± 0.2525, n=21	3.562 ± 0.1499, n=29
AP Height	Baseline Characterization	Unpaired t-Test, Two-Tailed	t=0.5947 df=48	0.5548	60.89 ± 1.607, n=21	59.42 ± 1.749, n=29
AP AHP	Baseline Characterization	Unpaired t-Test, Two-Tailed	t=0.3451 df=48	0.8965	-15.43 ± 1.19, n=21	-14.88 ± 1.046, n=29
Firing Rate	Baseline Characterization	Unpaired t-Test, Two-Tailed	t=2.578 df=28	0.0155	2.633 ± 0.2464, n=12	1.703 ± 0.244, n=18
Cm	Ih Measurement	Unpaired t-Test, Two-Tailed	t=2.058 df=36	0.0469	51.94 ± 4.45, n=14	42.53 ± 2.351, n=24
Rm	Ih Measurement	Unpaired t-Test, Two-Tailed	t=2.749 df=36	0.0093	170.8 ± 11.96, n=14	222.4 ± 12.49, n=24
Rs	Ih Measurement	Unpaired t-Test, Two-Tailed	t=0.6368 df=36	0.5283	17.78 ± 1.478, n=14	19.1 ± 1.334, n=24
Holding	Ih Measurement	Unpaired t-Test, Two-Tailed	t=0.7528 df=36	0.4565	-61.15 ± 8.657, n=14	-52.11 ± 7.642, n=24
Current Density (Ih Max)	Ih Measurement	Unpaired t-Test, Two-Tailed	t=1.559 df=36	0.1279	-2.124 ± 0.2643, n=14	-1.664 ± 0.1648, n=24
Cm	Picrotoxin Rescue	Unpaired t-Test, Two-Tailed	t=3.024 df=47	0.004	47.74 ± 2.276, n=29	36.62 ± 2.956, n=20
Rm	Picrotoxin Rescue	Unpaired t-Test, Two-Tailed	t=3.613 df=47	0.0007	181 ± 8.464, n=29	239 ± 14.94, n=20
Rs	Picrotoxin Rescue	Unpaired t-Test, Two-Tailed	t=0.4293 df=47	0.6696	17.23 ± 1.054, n=29	18.04 ± 1.648, n=20
Holding	Picrotoxin Rescue	Unpaired t-Test, Two-Tailed	t=0.5125 df=47	0.6107	-56.77 ± 5.88, n=29	-61.64 ± 7.639, n=20
Rheobase	Picrotoxin Rescue	Unpaired t-Test, Two-Tailed	t=4.15 df=43	0.0002	131.5 ± 7.537, n=25	89.14 ± 6.413, n=20
AP Threshold	Picrotoxin Rescue	Unpaired t-Test, Two-Tailed	t=0.7528 df=43	0.4557	-36.92 ± 1.193, n=25	-38.33 ± 1.472, n=20
AP Duration	Picrotoxin Rescue	Unpaired t-Test, Two-Tailed	t=0.5139 df=43	0.61	4.156 ± 0.1589, n=25	4.03 ± 0.1891, n=20
AP Height	Picrotoxin Rescue	Unpaired t-Test, Two-Tailed	t=0.06774 df=43	0.9463	56.16 ± 2.021, n=25	55.99 ± 1.151, n=20
AP AHP	Picrotoxin Rescue	Unpaired t-Test, Two-Tailed	t=1.403 df=43	0.1678	-13.84 ± 1.125, n=25	-11.78 ± 0.844, n=20
Firing Rate	Picrotoxin Rescue	Unpaired t-Test, Two-Tailed	t=0.3707 df=27	0.7137	2.434 ± 0.208, n=16	2.535 ± 0.1596, n=13
Ih Currents
Property	Statistical Test	Factor	Statistic	p	n
Ih Currents: WT vs KO	2-Way RM ANOVA	Interaction	F (7, 252) = 5.367	<0.0001	WT = 14; KO = 24
Ih Currents: WT vs KO	2-Way RM ANOVA	Trial	F (7, 252) = 100.3	<0.0001	WT = 14; KO = 24
Ih Currents: WT vs KO	2-Way RM ANOVA	Genotype	F (1, 36) = 6.529	0.015	WT = 14; KO = 24
Ih Currents: WT vs KO: -60 mV	Bonferroni's multiple comparisons test		t = 0.03703	>0.9999	WT = 14; KO = 24
Ih Currents: WT vs KO: -70 mV	Bonferroni's multiple comparisons test		t = 0.1444	>0.9999	WT = 14; KO = 24
Ih Currents: WT vs KO: -80 mV	Bonferroni's multiple comparisons test		t = 0.6899	>0.9999	WT = 14; KO = 24
Ih Currents: WT vs KO: -90 mV	Bonferroni's multiple comparisons test		t = 1.901	0.4669	WT = 14; KO = 24
Ih Currents: WT vs KO: -100 mV	Bonferroni's multiple comparisons test		t = 2.749	0.0509	WT = 14; KO = 24
Ih Currents: WT vs KO: -110 mV	Bonferroni's multiple comparisons test		t = 3.274	0.0095	WT = 14; KO = 24
Ih Currents: WT vs KO: -120 mV	Bonferroni's multiple comparisons test		t = 3.299	0.0087	WT = 14; KO = 24
Ih Currents: WT vs KO: -130 mV	Bonferroni's multiple comparisons test		t = 3.921	0.0009	WT = 14; KO = 24
Ih Current Density: WT vs KO	2-Way RM ANOVA	Interaction	F (7, 252) = 1.771	0.0935	WT = 14; KO = 24
Ih Current Density: WT vs KO	2-Way RM ANOVA	Trial	F (7, 252) = 125.6	<0.0001	WT = 14; KO = 24
Ih Current Density: WT vs KO	2-Way RM ANOVA	Genotype	F (1, 36) = 3.676	0.0632	WT = 14; KO = 24
Ih Current Density: WT vs KO: -60 mV	Bonferroni's multiple comparisons test		t = 0.01566	>0.9999	WT = 14; KO = 24
Ih Current Density: WT vs KO: -70 mV	Bonferroni's multiple comparisons test		t = 0.2168	>0.9999	WT = 14; KO = 24
Ih Current Density: WT vs KO: -80 mV	Bonferroni's multiple comparisons test		t = 0.6091	0.9981	WT = 14; KO = 24
Ih Current Density: WT vs KO: -90 mV	Bonferroni's multiple comparisons test		t = 1.497	0.6878	WT = 14; KO = 24
Ih Current Density: WT vs KO: -100 mV	Bonferroni's multiple comparisons test		t = 2.101	0.2573	WT = 14; KO = 24
Ih Current Density: WT vs KO: -110 mV	Bonferroni's multiple comparisons test		t = 2.253	0.1834	WT = 14; KO = 24
Ih Current Density: WT vs KO: -120 mV	Bonferroni's multiple comparisons test		t = 1.774	0.4738	WT = 14; KO = 24
Ih Current Density: WT vs KO: -130 mV	Bonferroni's multiple comparisons test		t = 2.612	0.0733	WT = 14; KO = 24
Ih Currents: WT vs KO vs KO + FSK	2-Way RM ANOVA	Interaction	F (14, 343) = 2.791	0.0006	WT = 14; KO = 24; KO + FSK = 14
Ih Currents: WT vs KO vs KO + FSK	2-Way RM ANOVA	Voltage	F (7, 343) = 130.2	<0.0001	WT = 14; KO = 24; KO + FSK = 14
Ih Currents: WT vs KO vs KO + FSK	2-Way RM ANOVA	Treatment Condtition	F (2, 49) = 3.444	0.0398	WT = 14; KO = 24; KO + FSK = 14
Ih Currents: WT vs KO	Bonferroni's multiple comparisons test		t = 2.577	0.0391	WT = 14; KO = 24; KO + FSK = 14
Ih Currents: WT vs KO + FSK	Bonferroni's multiple comparisons test		t = 1.034	0.9181	WT = 14; KO = 24; KO + FSK = 14
Ih Currents: KO vs KO + FSK	Bonferroni's multiple comparisons test		t = 1.414	0.4911	WT = 14; KO = 24; KO + FSK = 14
Ih Current Density: WT vs KO vs KO + FSK	2-Way RM ANOVA	Interaction	F (14, 343) = 1.124	0.3348	WT = 14; KO = 24; KO + FSK = 14
Ih Current Density: WT vs KO vs KO + FSK	2-Way RM ANOVA	Voltage	F (7, 343) = 150.2	<0.0001	WT = 14; KO = 24; KO + FSK = 14
Ih Current Density: WT vs KO vs KO + FSK	2-Way RM ANOVA	Treatment Condtition	F (2, 49) = 1.826	0.1719	WT = 14; KO = 24; KO + FSK = 14
Ih Current Density: WT vs KO	Bonferroni's multiple comparisons test		t = 1.847	0.2123	WT = 14; KO = 24; KO + FSK = 14
Ih Current Density: WT vs KO + FSK	Bonferroni's multiple comparisons test		t = 0.6331	>0.9999	WT = 14; KO = 24; KO + FSK = 14
Ih Current Density: KO vs KO + FSK	Bonferroni's multiple comparisons test		t = 1.136	0.785	WT = 14; KO = 24; KO + FSK = 14
Tail Currents: I/I Max	WT (n = 14)	KO (n = 24)	KO + FSK (n = 14)
Top	1.034	1.12	0.9832
Bottom	-0.03461	-0.04129	-0.0008202
EV50	-96.98	-101.9	-95.96
Top - 95% CI	0.9636 to 1.141	1.014 to 1.322	0.9142 to 1.086
Bottom - 95% CI	-0.1195 to 0.02388	-0.1386 to 0.02012	-0.09296 to 0.06296
EV50 - 95% CI	-99.69 to -94.52	-106.5 to -98.86	-98.93 to -93.11
Correlation: Ih current vs Membrane Capacitance
Measure 1	Measure 2	Genotype	R-square	F	DFn, DFd	p	Slope ± SEM
Cm	Ih Magnitude	WT	0.3884	7.621	1, 12	0.0173	-2.623 ± 0.9502
Cm	Ih Magnitude	KO	0.165	4.347	1, 22	0.0489	-1.181 ± 0.5664
Cm	Ih Magnitude	All Mice	0.3495	19.35	1, 36	<0.0001	-2.22 ± 0.5048
Spontaneous Post-Synaptic Currents
Property	Experiment	Statistical Test	Statistic	p	WT Median, n	KO Median, n	D'Agostino & Pearson normality test
IPSC Frequency	sIPSCs	Mann Whitney test	U = 74.5	0.0085	1.16, n=18	2.51, n=17	WT p = 0.0056; KO p = 0.0040
IPSC Amplitude	sIPSCs	Mann Whitney test	U = 96.5	0.0628	35.29, n=18	40.87, n=17	WT p = 0.1877; KO p = 0.6309
EPSC Frequency	sEPSCs	Mann Whitney test	U = 87.0	0.6501	2.95, n=15	3.13, n=13	WT p = 0.2621; KO p = 0.0908
EPSC Amplitude	sEPSCs	Mann Whitney test	U = 90.0	0.751	13.03, n=15	13.85, n=13	WT p = 0.4738; KO p = 0.7739
IPSC Frequency	sIPSCs	Unpaired t-Test, Two-Tailed	t=2.204 df=33	0.0346	1.974 ± 0.4024, n=18	3.854 ± 0.7677, n=17
IPSC Amplitude	sIPSCs	Unpaired t-Test, Two-Tailed	t=1.633 df=33	0.112	36.04 ± 1.826, n=18	40.13 ± 1.708, n=17
EPSC Frequency	sEPSCs	Unpaired t-Test, Two-Tailed	t=0.1942 df=26	0.8475	2.883 ± 0.5031, n=15	2.737 ± 0.5592, n=13
EPSC Amplitude	sEPSCs	Unpaired t-Test, Two-Tailed	t=0.07474 df=26	0.941	13.52 ± 1.037, n=15	13.42 ± 0.6316, n=13
Picrotoxin Rescue: Spontaneous Spiking Groupwise
Property	Statistical Test	Factor	Statistic	p	n
Picrotoxin Rescue Firing Rate: WT vs KO	2-Way ANOVA	Interaction	F (1, 55) = 5.176	0.0268	WT Control = 12; KO Control = 18; WT PTX = 16; KO PTX = 13
Picrotoxin Rescue Firing Rate: WT vs KO	2-Way ANOVA	Drug	F (1, 55) = 1.954	0.1677	WT Control = 12; KO Control = 18; WT PTX = 16; KO PTX = 13
Picrotoxin Rescue Firing Rate: WT vs KO	2-Way ANOVA	Genotype	F (1, 55) = 3.347	0.0727	WT Control = 12; KO Control = 18; WT PTX = 16; KO PTX = 13
Control: WT vs. Control: KO	Bonferroni's multiple comparisons test		t = 2.905	0.0317	WT Control = 12; KO Control = 18; WT PTX = 16; KO PTX = 13
Control: WT vs. PTX: WT	Bonferroni's multiple comparisons test		t = 0.6057	>0.9999	WT Control = 12; KO Control = 18; WT PTX = 16; KO PTX = 13
Control: WT vs. PTX: KO	Bonferroni's multiple comparisons test		t = 0.2843	>0.9999	WT Control = 12; KO Control = 18; WT PTX = 16; KO PTX = 13
Control: KO vs. PTX: WT	Bonferroni's multiple comparisons test		t = 2.478	0.0979	WT Control = 12; KO Control = 18; WT PTX = 16; KO PTX = 13
Control: KO vs. PTX: KO	Bonferroni's multiple comparisons test		t = 2.662	0.061	WT Control = 12; KO Control = 18; WT PTX = 16; KO PTX = 13
PTX: WT vs. PTX: KO	Bonferroni's multiple comparisons test		t = 0.3147	>0.9999	WT Control = 12; KO Control = 18; WT PTX = 16; KO PTX = 13
Picrotoxin Rescue: Rheobase Groupwise
Property	Statistical Test	Factor	Statistic	p	n
Picrotoxin Rescue Rheobase: WT vs KO	2-Way ANOVA	Interaction	F (1, 91) = 30	<0.0001	WT Control = 21; KO Control = 24; WT PTX = 25; KO PTX = 20
Picrotoxin Rescue Rheobase: WT vs KO	2-Way ANOVA	Drug	F (1, 91) = 23.91	<0.0001	WT Control = 21; KO Control = 24; WT PTX = 25; KO PTX = 20
Picrotoxin Rescue Rheobase: WT vs KO	2-Way ANOVA	Genotype	F (1, 91) = 0.07377	0.7865	WT Control = 21; KO Control = 24; WT PTX = 25; KO PTX = 20
Control: WT vs. Control: KO	Bonferroni's multiple comparisons test		t = 4.102	0.0005	WT Control = 21; KO Control = 24; WT PTX = 25; KO PTX = 20
Control: WT vs. PTX: WT	Bonferroni's multiple comparisons test		t = 0.4059	>0.9999	WT Control = 21; KO Control = 24; WT PTX = 25; KO PTX = 20
Control: WT vs. PTX: KO	Bonferroni's multiple comparisons test		t = 3.066	0.0171	WT Control = 21; KO Control = 24; WT PTX = 25; KO PTX = 20
Control: KO vs. PTX: WT	Bonferroni's multiple comparisons test		t = 3.923	0.001	WT Control = 21; KO Control = 24; WT PTX = 25; KO PTX = 20
Control: KO vs. PTX: KO	Bonferroni's multiple comparisons test		t = 7.505	<0.0001	WT Control = 21; KO Control = 24; WT PTX = 25; KO PTX = 20
PTX: WT vs. PTX: KO	Bonferroni's multiple comparisons test		t = 3.648	0.0026	WT Control = 21; KO Control = 24; WT PTX = 25; KO PTX = 20

## Sheet: dLight Baseline
Figure 1	Test	Stat	p	WT Mean, SEM, n	KO Mean, SEM, n
Median dF/F Baseline	Unpaired t-Test, Two-Tailed	t=1.014 df=50	0.3153	-0.3691 ± 0.06098, n=19	-0.4699 ± 0.06663, n=33
Event Rate	Unpaired t-Test, Two-Tailed	t=3.062 df=50	0.0035	0.5036 ± 0.02292, n=19	0.4163 ± 0.01714, n=33
Event Magnitude	Unpaired t-Test, Two-Tailed	t=0.8298 df=50	0.4106	3.835 ± 0.02315, n=19	3.88 ± 0.03851, n=33
Event FWHM	Unpaired t-Test, Two-Tailed	t=0.4312 df=50	0.6682	0.5844 ± 0.01242, n=19	0.5919 ± 0.01106, n=33
Morphine Pre-Treatment
Condition 1	Condition 2		Test	Stat	p	Cond 1 Mean, SEM	Cond 2 Mean, SEM	n
Baseline	Saline	Event Rate	Paired t-Test, Two-Tailed	t=1.662 df=8	0.1352	0.4256 ± 0.01875	0.4564 ± 0.01483	9
Morphine	Saline	Event Rate	Paired t-Test, Two-Tailed	t=2.794 df=8	0.0234	0.5428 ± 0.02542	0.4564 ± 0.01483	9
Baseline	Morphine	Event Rate	Paired t-Test, Two-Tailed	t=2.968 df=8	0.0179	0.4256 ± 0.01875	0.5428 ± 0.02542	9
Baseline	Saline	Event Magnitude	Paired t-Test, Two-Tailed	t=0.4572 df=8	0.6597	3.784 ± 0.1083	3.738 ± 0.1008	9
Morphine	Saline	Event Magnitude	Paired t-Test, Two-Tailed	t=0.8922 df=8	0.3983	3.611 ± 0.1048	3.738 ± 0.1008	9
Baseline	Morphine	Event Magnitude	Paired t-Test, Two-Tailed	t=1.145 df=8	0.2853	3.784 ± 0.1083	3.611 ± 0.1048	9
Baseline	Saline	Event FWHM	Paired t-Test, Two-Tailed	t=0.252 df=8	0.8074	0.5874 ± 0.03028	0.5794 ± 0.02397	9
Morphine	Saline	Event FWHM	Paired t-Test, Two-Tailed	t=0.2108 df=8	0.8383	0.5876 ± 0.03395	0.5794 ± 0.02397	9
Baseline	Morphine	Event FWHM	Paired t-Test, Two-Tailed	t=0.002096 df=8	0.9984	0.5874 ± 0.03028	0.5876 ± 0.03395	9
Morphine % Increase vs Saline	Test	Stat	p	Saline Mean, SEM, n	Morphine Mean, SEM, n
Event Rate	Paired t-Test, Two-Tailed	t=2.651 df=8	0.0292	5.53 ± 3.464, n=9	26.69 ± 8.942, n=9
Event Magnitude	Paired t-Test, Two-Tailed	t=0.8119 df=8	0.4403	-0.8711 ± 2.738, n=9	-3.893 ± 3.995, n=9
Event FWHM	Paired t-Test, Two-Tailed	t=0.4047 df=8	0.6963	-0.02111 ± 4.607, n=9	2.768 ± 8.906, n=9

## Sheet: dLight Pavlovian Conditioning
Free Sucrose Consumption
Measure	Statistical Test	Statistic	p	WT Mean, SEM, n	KO Mean, SEM, n
dLight Peak Response	Unpaired t-Test, Two-Tailed	t=0.6631 df=24	0.5136	5.566 ± 0.8734, n=13	6.388 ± 0.8787, n=13
Total Licks	Unpaired t-Test, Two-Tailed	t=1.324 df=24	0.1979	75.54 ± 12.69, n=13	102.2 ± 15.57, n=13
Licks/Bout	Unpaired t-Test, Two-Tailed	t=0.1402 df=24	0.8897	22.8 ± 3.885, n=13	23.59 ± 4.038, n=13
Pavlovian Conditioning
Measure	Statistical Test	Factor	Statistic	p	n
Licks During CS: Session by Session	2-Way RM ANOVA	Interaction	F (9, 180) = 0.4754	0.8898	WT = 10; KO = 12
Licks During CS: Session by Session	2-Way RM ANOVA	Session	F (9, 180) = 21.36	<0.0001	WT = 10; KO = 12
Licks During CS: Session by Session	2-Way RM ANOVA	Genotype	F (1, 20) = 0.08559	0.7729	WT = 10; KO = 12
Licks During CS: WT Session 1 vs Session 2	Bonferroni's multiple comparisons test		t = 1.335	>0.9999	WT = 10
Licks During CS: WT Session 1 vs Session 3	Bonferroni's multiple comparisons test		t = 1.995	0.428	WT = 10
Licks During CS: WT Session 1 vs Session 4	Bonferroni's multiple comparisons test		t = 3.528	0.0048	WT = 10
Licks During CS: WT Session 1 vs Session 5	Bonferroni's multiple comparisons test		t = 4.127	0.0005	WT = 10
Licks During CS: WT Session 1 vs Session 6	Bonferroni's multiple comparisons test		t = 5.034	<0.0001	WT = 10
Licks During CS: WT Session 1 vs Session 7	Bonferroni's multiple comparisons test		t = 5.137	<0.0001	WT = 10
Licks During CS: WT Session 1 vs Session 8	Bonferroni's multiple comparisons test		t = 6.585	<0.0001	WT = 10
Licks During CS: WT Session 1 vs Session 9	Bonferroni's multiple comparisons test		t = 6.193	<0.0001	WT = 10
Licks During CS: WT Session 1 vs Session 10	Bonferroni's multiple comparisons test		t = 6.918	<0.0001	WT = 10
Licks During CS: KO Session 1 vs Session 2	Bonferroni's multiple comparisons test		t = 1.236	>0.9999	WT = 12
Licks During CS: KO Session 1 vs Session 3	Bonferroni's multiple comparisons test		t = 3.288	0.0109	WT = 12
Licks During CS: KO Session 1 vs Session 4	Bonferroni's multiple comparisons test		t = 4.071	0.0006	WT = 12
Licks During CS: KO Session 1 vs Session 5	Bonferroni's multiple comparisons test		t = 4.606	<0.0001	WT = 12
Licks During CS: KO Session 1 vs Session 6	Bonferroni's multiple comparisons test		t =4.493	0.0001	WT = 12
Licks During CS: KO Session 1 vs Session 7	Bonferroni's multiple comparisons test		t = 5.022	<0.0001	WT = 12
Licks During CS: KO Session 1 vs Session 8	Bonferroni's multiple comparisons test		t = 5.68	<0.0001	WT = 12
Licks During CS: KO Session 1 vs Session 9	Bonferroni's multiple comparisons test		t = 6.88	<0.0001	WT = 12
Licks During CS: KO Session 1 vs Session 10	Bonferroni's multiple comparisons test		t = 7.514	<0.0001	WT = 12
Anticipatory Licks: Session by Session	2-Way RM ANOVA	Interaction	F (9, 180) = 0.3884	0.9396	WT = 10; KO = 12
Anticipatory Licks: Session by Session	2-Way RM ANOVA	Session	F (9, 180) = 9.064	<0.0001	WT = 10; KO = 12
Anticipatory Licks: Session by Session	2-Way RM ANOVA	Genotype	F (1, 20) = 1.023	0.3238	WT = 10; KO = 12
CS Peak: Session by Session	2-Way RM ANOVA	Interaction	F (9, 180) = 0.8125	0.6053	WT = 10; KO = 12
CS Peak: Session by Session	2-Way RM ANOVA	Session	F (9, 180) = 8.465	<0.0001	WT = 10; KO = 12
CS Peak: Session by Session	2-Way RM ANOVA	Genotype	F (1, 20) = 2.55	0.126	WT = 10; KO = 12
US Peak: Session by Session	2-Way RM ANOVA	Interaction	F (9, 180) = 0.4882	0.8813	WT = 10; KO = 12
US Peak: Session by Session	2-Way RM ANOVA	Session	F (9, 180) = 5.392	<0.0001	WT = 10; KO = 12
US Peak: Session by Session	2-Way RM ANOVA	Genotype	F (1, 20) = 7.094	0.0149	WT = 10; KO = 12
US Peak: WT vs KO Session 1	Bonferroni's multiple comparisons test		t = 0.9185	>0.9999	WT = 10; KO = 12
US Peak: WT vs KO Session 2	Bonferroni's multiple comparisons test		t = 1.713	0.8823	WT = 10; KO = 12
US Peak: WT vs KO Session 3	Bonferroni's multiple comparisons test		t = 2.842	0.0495	WT = 10; KO = 12
US Peak: WT vs KO Session 4	Bonferroni's multiple comparisons test		t = 1.516	>0.9999	WT = 10; KO = 12
US Peak: WT vs KO Session 5	Bonferroni's multiple comparisons test		t = 1.498	>0.9999	WT = 10; KO = 12
US Peak: WT vs KO Session 6	Bonferroni's multiple comparisons test		t = 1.644	>0.9999	WT = 10; KO = 12
US Peak: WT vs KO Session 7	Bonferroni's multiple comparisons test		t =2.548	0.1159	WT = 10; KO = 12
US Peak: WT vs KO Session 8	Bonferroni's multiple comparisons test		t = 1.841	0.6714	WT = 10; KO = 12
US Peak: WT vs KO Session 9	Bonferroni's multiple comparisons test		t = 1.836	0.679	WT = 10; KO = 12
US Peak: WT vs KO Session 10	Bonferroni's multiple comparisons test		t = 1.654	0.9968	WT = 10; KO = 12
Pump Peak: Session by Session	2-Way RM ANOVA	Interaction	F (9, 180) = 0.3033	P=0.9730	WT = 10; KO = 12
Pump Peak: Session by Session	2-Way RM ANOVA	Session	F (9, 180) = 11.73	P<0.0001	WT = 10; KO = 12
Pump Peak: Session by Session	2-Way RM ANOVA	Genotype	F (1, 20) = 0.2775	P=0.6041	WT = 10; KO = 12
Measure	Experiment	Statistical Test	Statistic	p	WT Mean, SEM, n	KO Mean, SEM, n
Licks During CS: Acquisition Rate	Pavlovian Conditioning	Unpaired t test	t=0.4036 df=20	0.6908	2.236 ± 0.4998, n=10	1.99 ± 0.3686, n=12
dLight Peak Rate of Change
Measure	Statistical Test	t-ratio	q	n	df	Notes
CS	Multiple t-tests	1	0.934285	WT = 10; KO = 12	20	Two-stage linear step-up procedure of Benjamini, Krieger and Yekutieli, with Q = 5%
US	Multiple t-tests	0.24	0.934285	WT = 10; KO = 12	20	Two-stage linear step-up procedure of Benjamini, Krieger and Yekutieli, with Q = 5%
Pump	Multiple t-tests	0.14	0.934285	WT = 10; KO = 12	20	Two-stage linear step-up procedure of Benjamini, Krieger and Yekutieli, with Q = 5%
Trace Feature Correlations
Behavior	Feature	Genotype	R-square	F	DFn, DFd	p
Acquisition Rate	CS Peak Rate of Change	WT	0.4757	7.258	1, 8	0.0273
Acquisition Rate	CS Peak Rate of Change	KO	0.5223	10.94	1, 10	0.0079
Acquisition Rate	US Peak Rate of Change	WT	0.6343	13.88	1, 8	0.0058
Acquisition Rate	US Peak Rate of Change	KO	0.362	5.675	1, 10	0.0385
Acquisition Rate	Pump Peak Rate of Change	WT	0.644	14.47	1, 8	0.0052
Acquisition Rate	Pump Peak Rate of Change	KO	0.6152	15.99	1, 10	0.0025
Trace Feature Correlations: WT vs KO
Comparison	Regression Feature	F	DFn, DFd	p
WT vs KO: CS Rate vs Aquisition Rate	Slope	0.5603	1,18	0.4638
WT vs KO: CS Rate vs Aquisition Rate	Elevations	3.112	1,19	0.0938
WT vs KO: US Rate vs Aquisition Rate	Slope	0.02792	1,18	0.8692
WT vs KO: US Rate vs Aquisition Rate	Elevations	0.003905	1,19	0.9508
WT vs KO: Pump Rate vs Aquisition Rate	Slope	0.0007515	1,18	0.9784
WT vs KO: Pump Rate vs Aquisition Rate	Elevations	0.5426	1,19	0.4703
Reward Omission
Measure	Statistical Test	Statistic	p	Session 10 Mean, SEM, n	Omission Mean, SEM, n
WT Session 10 vs Omission	Paired t-test	t=4.033 df=9	0.003	3.807 ± 0.6424, n=10	1.597 ± 0.3118, n=10
KO Session 10 vs Omission	Paired t-test	t=4.495 df=11	0.0009	5.292 ± 0.5886, n=12	1.816 ± 0.3863, n=12
Measure	Experiment	Statistical Test	Statistic	p	WT Mean, SEM, n	KO Mean, SEM, n
CS Onset Peak: Session 1	Pavlovian Conditioning	Unpaired t test	t=2.346 df=20	0.0294	2.103 ± 0.3777, n=10	3.734 ± 0.5496, n=12
Session 1: CS Onset Peak
Measure	Statistical Test	Factor	Statistic	p	n
CS Onset Peak: Trial by Trial	2-Way RM ANOVA	Interaction	F (19, 380) = 2.242	0.0022	WT = 10; KO = 12
CS Onset Peak: Trial by Trial	2-Way RM ANOVA	Trial	F (19, 380) = 3.07	<0.0001	WT = 10; KO = 12
CS Onset Peak: Trial by Trial	2-Way RM ANOVA	Genotype	F (1, 20) = 6.242	0.0213	WT = 10; KO = 12
US Peak: WT vs KO Trial 1	Bonferroni's multiple comparisons test		t = 3.429	0.0134	WT = 10; KO = 12
US Peak: WT vs KO Trial 2	Bonferroni's multiple comparisons test		t = 0.6348	>0.9999	WT = 10; KO = 12
US Peak: WT vs KO Trial 3	Bonferroni's multiple comparisons test		t = 3.473	0.0114	WT = 10; KO = 12
US Peak: WT vs KO Trial 4	Bonferroni's multiple comparisons test		t = 4.048	0.0012	WT = 10; KO = 12
US Peak: WT vs KO Trial 5	Bonferroni's multiple comparisons test		t = 1.612	>0.9999	WT = 10; KO = 12
US Peak: WT vs KO Trial 6	Bonferroni's multiple comparisons test		t = 2.72	0.1365	WT = 10; KO = 12
US Peak: WT vs KO Trial 7	Bonferroni's multiple comparisons test		t = 0.3613	>0.9999	WT = 10; KO = 12
US Peak: WT vs KO Trial 8	Bonferroni's multiple comparisons test		t = 1.798	>0.9999	WT = 10; KO = 12
US Peak: WT vs KO Trial 9	Bonferroni's multiple comparisons test		t = 0.5944	>0.9999	WT = 10; KO = 12
US Peak: WT vs KO Trial 10	Bonferroni's multiple comparisons test		t = 1.998	0.9286	WT = 10; KO = 12
US Peak: WT vs KO Trial 11	Bonferroni's multiple comparisons test		t = 2.254	0.4943	WT = 10; KO = 12
US Peak: WT vs KO Trial 12	Bonferroni's multiple comparisons test		t = 1.564	>0.9999	WT = 10; KO = 12
US Peak: WT vs KO Trial 13	Bonferroni's multiple comparisons test		t = 0.5528	>0.9999	WT = 10; KO = 12
US Peak: WT vs KO Trial 14	Bonferroni's multiple comparisons test		t = 0.6793	>0.9999	WT = 10; KO = 12
US Peak: WT vs KO Trial 15	Bonferroni's multiple comparisons test		t = 0.9618	>0.9999	WT = 10; KO = 12
US Peak: WT vs KO Trial 16	Bonferroni's multiple comparisons test		t = 0.6504	>0.9999	WT = 10; KO = 12
US Peak: WT vs KO Trial 17	Bonferroni's multiple comparisons test		t = 0.6266	>0.9999	WT = 10; KO = 12
US Peak: WT vs KO Trial 18	Bonferroni's multiple comparisons test		t = 0.8265	>0.9999	WT = 10; KO = 12
US Peak: WT vs KO Trial 19	Bonferroni's multiple comparisons test		t = 0.3311	>0.9999	WT = 10; KO = 12
US Peak: WT vs KO Trial 20	Bonferroni's multiple comparisons test		t = 1.216	>0.9999	WT = 10; KO = 12
CS Peak vs Licks During CS
Behavior	Feature	Genotype	Session	R-square	F	DFn, DFd	p
Licks During CS	CS Peak	WT	1	0.2493	2.656	1, 8	0.1418
Licks During CS	CS Peak	KO	1	0.1545	1.828	1, 10	0.2062
Licks During CS	CS Peak	WT	2	0.008108	0.0654	1, 8	0.8046
Licks During CS	CS Peak	KO	2	0.2202	2.824	1, 10	0.1238
Licks During CS	CS Peak	WT	3	0.3042	3.498	1, 8	0.0984
Licks During CS	CS Peak	KO	3	0.2422	3.196	1, 10	0.1041
Licks During CS	CS Peak	WT	4	0.2791	3.097	1, 8	0.1165
Licks During CS	CS Peak	KO	4	0.2968	4.221	1, 10	0.067
Licks During CS	CS Peak	WT	5	0.3759	4.818	1, 8	0.0595
Licks During CS	CS Peak	KO	5	0.6493	18.51	1, 10	0.0016
Licks During CS	CS Peak	WT	6	0.3304	3.948	1, 8	0.0822
Licks During CS	CS Peak	KO	6	0.6771	20.97	1, 10	0.001
Licks During CS	CS Peak	WT	7	0.2952	3.35	1, 8	0.1046
Licks During CS	CS Peak	KO	7	0.5875	14.24	1, 10	0.0036
Licks During CS	CS Peak	WT	8	0.6377	14.08	1, 8	0.0056
Licks During CS	CS Peak	KO	8	0.7361	27.89	1, 10	0.0004
Licks During CS	CS Peak	WT	9	0.3709	4.716	1, 8	0.0617
Licks During CS	CS Peak	KO	9	0.7674	33	1, 10	0.0002
Licks During CS	CS Peak	WT	10	0.6353	13.93	1, 8	0.0058
Licks During CS	CS Peak	KO	10	0.4582	8.456	1, 10	0.0156
CS Peak vs Licks During CS: WT vs KO
Comparison	Session	Regression Feature	F	DFn, DFd	p
WT vs KO: CS Peak vs CS Licks	1	Slope	3.713	1,18	0.0699
WT vs KO: CS Peak vs CS Licks	1	Elevations	4.884	1,19	0.0396
WT vs KO: CS Peak vs CS Licks	2	Slope	1.905	1,18	0.1844
WT vs KO: CS Peak vs CS Licks	2	Elevations	2.352	1,19	0.1416
WT vs KO: CS Peak vs CS Licks	3	Slope	0.5442	1,18	0.4702
WT vs KO: CS Peak vs CS Licks	3	Elevations	0.6239	1,19	0.4393
WT vs KO: CS Peak vs CS Licks	4	Slope	0.04195	1,18	0.84
WT vs KO: CS Peak vs CS Licks	4	Elevations	1.354	1,19	0.2591
WT vs KO: CS Peak vs CS Licks	5	Slope	1.843	1,18	0.1913
WT vs KO: CS Peak vs CS Licks	5	Elevations	2.739	1,19	0.1144
WT vs KO: CS Peak vs CS Licks	6	Slope	2.09	1,18	0.1655
WT vs KO: CS Peak vs CS Licks	6	Elevations	4.43	1,19	0.0489
WT vs KO: CS Peak vs CS Licks	7	Slope	3.165	1,18	0.0921
WT vs KO: CS Peak vs CS Licks	7	Elevations	5.012	1,19	0.0373
WT vs KO: CS Peak vs CS Licks	8	Slope	1.942	1,18	0.1805
WT vs KO: CS Peak vs CS Licks	8	Elevations	8.997	1,19	0.0074
WT vs KO: CS Peak vs CS Licks	9	Slope	3.814	1,18	0.0665
WT vs KO: CS Peak vs CS Licks	9	Elevations	7.277	1,19	0.0143
WT vs KO: CS Peak vs CS Licks	10	Slope	0.02645	1,18	0.8726
WT vs KO: CS Peak vs CS Licks	10	Elevations	9.526	1,19	0.0061

## Sheet: Social Interaction
Measure	Statistical Test	Statistic	p	WT Mean, SEM, n	KO Mean, SEM, n
Cumulative Duration: Social Interaction Side	Unpaired t-Test, Two-Tailed	t=0.1625 df=20	0.8725	377.7 ± 23.01, n=10	371.6 ± 28.26, n=12
Cumulative Duration: Social Interaction Zone	Unpaired t-Test, Two-Tailed	t=1.006 df=20	0.3263	117.8 ± 7.829, n=10	133.9 ± 12.95, n=12
Social Interaction Latency	Unpaired t-Test, Two-Tailed	t=0.5401 df=20	0.5951	31.18 ± 12.86, n=10	41.97 ± 14.74, n=12
Number of Social Interactions	Unpaired t-Test, Two-Tailed	t=0.1157 df=20	0.9091	80.7 ± 9.669, n=10	79 ± 10.71, n=12
Total Distance Travelled	Unpaired t-Test, Two-Tailed	t=1.44 df=20	0.1654	2487 ± 87.57, n=10	2731 ± 135.6, n=12
Social Interaction: dLight Peaks
Property	Statistical Test	Factor	Statistic	p	n
Social Interaction: WT vs KO	2-Way RM ANOVA	Interaction	F (4, 48) = 1.076	P=0.3790	WT = 7; KO = 7
Social Interaction: WT vs KO	2-Way RM ANOVA	Trial	F (4, 48) = 24.3	P<0.0001	WT = 7; KO = 7
Social Interaction: WT vs KO	2-Way RM ANOVA	Genotype	F (1, 12) = 4.211	P=0.0626	WT = 7; KO = 7
WT vs KO: Interaction 1	Bonferroni's multiple comparisons test		t = 0.1485	>0.9999	WT = 7; KO = 7
WT vs KO: Interaction 2	Bonferroni's multiple comparisons test		t = 1.722	0.4512	WT = 7; KO = 7
WT vs KO: Interaction 3	Bonferroni's multiple comparisons test		t = 1.016	>0.9999	WT = 7; KO = 7
WT vs KO: Interaction 4	Bonferroni's multiple comparisons test		t = 1.959	0.274	WT = 7; KO = 7
WT vs KO: Interaction 5	Bonferroni's multiple comparisons test		t = 0.5359	>0.9999	WT = 7; KO = 7

## Sheet: dLight Fear Conditioning
Fear Conditioning
Measure	Statistical Test	Factor	Statistic	p	n
Freezing: Trial by Trial	2-Way RM ANOVA	Interaction	F (14, 406) = 1.321	0.1912	WT = 13; KO = 18
Freezing: Trial by Trial	2-Way RM ANOVA	Trial	F (14, 406) = 28.56	<0.0001	WT = 13; KO = 18
Freezing: Trial by Trial	2-Way RM ANOVA	Genotype	F (1, 29) = 18.54	0.0002	WT = 13; KO = 18
Measure	Experiment	Statistical Test	Statistic	p	WT Mean, SEM, n	KO Mean, SEM, n
Fear Conditioning: Acquisition Rate	Cued Fear Conditioning	Unpaired t-Test, Two-Tailed	t=2.083 df=29	0.0462	1.238 ± 0.106, n=13	0.9128 ± 0.1081, n=18
Fear Conditioning: Freezing - Last 8	Cued Fear Conditioning	Unpaired t-Test, Two-Tailed	t=4.792 df=29	<0.0001	7.676 ± 0.3103, n=13	5.287 ± 0.3588, n=18
Fear Conditioning: Latency to Freeze	Cued Fear Conditioning	Unpaired t-Test, Two-Tailed	t=2.895 df=29	0.0071	2.088 ± 0.2901, n=13	3.869 ± 0.4775, n=18
dLight Trial by Trial
Measure	Statistical Test	Factor	Statistic	p	n
CS Peak: Trial by Trial	2-Way RM ANOVA	Interaction	F (14, 280) = 1.662	0.0632	WT = 10; KO = 12
CS Peak: Trial by Trial	2-Way RM ANOVA	Trial	F (14, 280) = 9.3	<0.0001	WT = 10; KO = 12
CS Peak: Trial by Trial	2-Way RM ANOVA	Genotype	F (1, 20) = 4.369	0.0496	WT = 10; KO = 12
US Peak: Trial by Trial	2-Way RM ANOVA	Interaction	F (14, 280) = 1.834	0.0338	WT = 10; KO = 12
US Peak: Trial by Trial	2-Way RM ANOVA	Trial	F (14, 280) = 8.225	<0.0001	WT = 10; KO = 12
US Peak: Trial by Trial	2-Way RM ANOVA	Genotype	F (1, 20) = 6.593	0.0184	WT = 10; KO = 12
US Anti-Peak: Trial by Trial	2-Way RM ANOVA	Interaction	F (14, 280) = 0.7064	0.7676	WT = 10; KO = 12
US Anti-Peak: Trial by Trial	2-Way RM ANOVA	Trial	F (14, 280) = 3.783	<0.0001	WT = 10; KO = 12
US Anti-Peak: Trial by Trial	2-Way RM ANOVA	Genotype	F (1, 20) = 1.495	0.2356	WT = 10; KO = 12
US Rebound AUC: Trial by Trial	2-Way RM ANOVA	Interaction	F (14, 280) = 0.5895	0.8727	WT = 10; KO = 12
US Rebound AUC: Trial by Trial	2-Way RM ANOVA	Trial	F (14, 280) = 4.632	<0.0001	WT = 10; KO = 12
US Rebound AUC: Trial by Trial	2-Way RM ANOVA	Genotype	F (1, 20) = 8.979	0.0071	WT = 10; KO = 12
US Rebound Peak: Trial by Trial	2-Way RM ANOVA	Interaction	F (14, 280) = 0.5013	0.9316	WT = 10; KO = 12
US Rebound Peak: Trial by Trial	2-Way RM ANOVA	Trial	F (14, 280) = 4.504	<0.0001	WT = 10; KO = 12
US Rebound Peak: Trial by Trial	2-Way RM ANOVA	Genotype	F (1, 20) = 3.512	0.0756	WT = 10; KO = 12
dLight Peaks
Measure	Experiment	Statistical Test	Statistic	p	WT Mean, SEM, n	KO Mean, SEM, n
CS Peak	Cued Fear Conditioning	Unpaired t-Test, Two-Tailed	t=2.324 df=20	0.0308	1.378 ± 0.3405, n=10	2.994 ± 0.5665, n=12
Measure	Statistical Test	t-ratio	q	n	df	Notes
US Peak	Multiple t-tests	2.424	0.0393109	WT = 10; KO = 12	20	Two-stage linear step-up procedure of Benjamini, Krieger and Yekutieli, with Q = 5%
US Antipeak	Multiple t-tests	1.398	0.139802	WT = 10; KO = 12	20	Two-stage linear step-up procedure of Benjamini, Krieger and Yekutieli, with Q = 5%
Rebound Peak	Multiple t-tests	1.647	0.120998	WT = 10; KO = 12	20	Two-stage linear step-up procedure of Benjamini, Krieger and Yekutieli, with Q = 5%
Rebound AUC	Multiple t-tests	2.846	0.0314227	WT = 10; KO = 12	20	Two-stage linear step-up procedure of Benjamini, Krieger and Yekutieli, with Q = 5%
Behavior Correlations
Behavior 1	Behavior 2	Genotype	R-square	F	DFn, DFd	p	Slope ± SEM
Freezing	Acquisition Rate	WT	0.5619	14.11	1, 11	0.0032	2.194 ± 0.5841
Freezing	Acquisition Rate	KO	0.2267	4.692	1, 16	0.0458	1.581 ± 0.7297
Freezing	Latency	WT	0.9276	140.9	1, 11	<0.0001	-1.03 ± 0.08678
Freezing	Latency	KO	0.8231	74.44	1, 16	<0.0001	-0.6817 ± 0.07901
Behavior Correlations: WT vs KO
Comparison	Regression Feature	F	DFn, DFd	p
WT vs KO: Freezing vs Acquisition Rate	Slope	0.3225	1,27	0.5748
WT vs KO: Freezing vs Acquisition Rate	Elevation	16.07	1,28	0.0004
WT vs KO: Freezing vs Latency	Slope	4.497	1,27	0.0433
WT vs KO: Freezing vs Latency	Elevation	n/a	n/a	n/a
Trace Feature Correlations
Nf1+/+				Nf1+/-					Nf1+/+				Nf1+/-
Feature	Behavior	r	p	Feature	Behavior	r	p		Behavior	Trial	r	p	Behavior	Trial	r	p
CS Trial 1	Acquisition	-0.292519	0.412114	CS Trial 1	Acquisition	-0.631863	0.0275125		CS: Acquisition	1	-0.43854	0.412114	CS: Acquisition	1	-0.631863	0.0275125
US Trial 1	Acquisition	-0.291769	0.41337	US Trial 1	Acquisition	-0.146268	0.650116		CS: Acquisition	2	-0.483267	0.111507	CS: Acquisition	2	-0.397434	0.200777
US Anti-Peak Trial 1	Acquisition	-0.38736	0.268756	US Anti-Peak Trial 1	Acquisition	0.00537363	0.986776		CS: Acquisition	3	-0.569737	0.95985	CS: Acquisition	3	-0.310409	0.326114
US Rebound Trial 1	Acquisition	0.0432394	0.90559	US Rebound Trial 1	Acquisition	-0.090815	0.778949		CS: Acquisition	4	-0.045779	0.216598	CS: Acquisition	4	-0.416343	0.178216
US Rebound AUC Trial 1	Acquisition	0.208902	0.562452	US Rebound AUC Trial 1	Acquisition	0.00204578	0.994965		CS: Acquisition	5	0.551784	0.143543	CS: Acquisition	5	-0.380315	0.222642
CS Trial Trial 1	Freezing	-0.470963	0.169475	CS Trial Trial 1	Freezing	-0.640773	0.0247621		CS: Acquisition	6	0.00754413	0.156179	CS: Acquisition	6	-0.494952	0.101838
US Trial Trial 1	Freezing	-0.396398	0.256766	US Trial Trial 1	Freezing	-0.122438	0.704629		CS: Acquisition	7	-0.224194	0.210507	CS: Acquisition	7	-0.0807684	0.802953
US Anti-Peak Trial 1	Freezing	-0.761159	0.0105487	US Anti-Peak Trial 1	Freezing	0.319765	0.31096		CS: Acquisition	8	0.185756	0.965644	CS: Acquisition	8	-0.315437	0.317921
US Rebound Trial 1	Freezing	-0.152556	0.673942	US Rebound Trial 1	Freezing	-0.0839179	0.79541		CS: Acquisition	9	-0.105923	0.0918965	CS: Acquisition	9	-0.218786	0.494499
US Rebound AUC Trial 1	Freezing	-0.222598	0.536485	US Rebound AUC Trial 1	Freezing	0.109085	0.735762		CS: Acquisition	10	-0.00735698	0.284781	CS: Acquisition	10	0.184179	0.566631
CS Trial 1	Latency	0.442788	0.200009	CS Trial 1	Latency	0.584282	0.046043		CS: Acquisition	11	0.286436	0.971538	CS: Acquisition	11	-0.199681	0.533802
US Trial 1	Latency	0.351967	0.318571	US Trial 1	Latency	0.122883	0.703599		CS: Acquisition	12	0.239734	0.999313	CS: Acquisition	12	0.0144267	0.964507
US Anti-Peak Trial 1	Latency	0.680197	0.0304335	US Anti-Peak Trial 1	Latency	-0.312898	0.322044		CS: Acquisition	13	0.203076	0.596069	CS: Acquisition	13	-0.157443	0.625065
US Rebound Trial 1	Latency	0.101637	0.779951	US Rebound Trial 1	Latency	-0.0252328	0.937956		CS: Acquisition	14	0.118171	0.574354	CS: Acquisition	14	-0.0491828	0.879354
US Rebound AUC Trial 1	Latency	0.0799082	0.826313	US Rebound AUC Trial 1	Latency	-0.204105	0.524584		CS: Acquisition	15	0.256612	0.226214	CS: Acquisition	15	0.214157	0.5039
CS All Trials	Acquisition	-0.553291	0.0970978	CS All Trials	Acquisition	-0.368106	0.239075		CS: Freezing	1	-0.387363	0.169475	CS: Freezing	1	-0.640773	0.0247621
US All Trials	Acquisition	-0.172755	0.633176	US All Trials	Acquisition	-0.414012	0.180906		CS: Freezing	2	-0.0959487	0.965476	CS: Freezing	2	-0.247841	0.437349
US Anti-Peak All Trials	Acquisition	-0.0857402	0.813816	US Anti-Peak All Trials	Acquisition	0.352386	0.26126		CS: Freezing	3	-0.414342	0.956079	CS: Freezing	3	-0.297981	0.346855
US Rebound All Trials	Acquisition	0.277112	0.438261	US Rebound All Trials	Acquisition	0.000670567	0.99835		CS: Freezing	4	-0.304522	0.656623	CS: Freezing	4	-0.395807	0.202796
US Rebound AUC All Trials	Acquisition	0.28255	0.428947	US Rebound AUC All Trials	Acquisition	0.198008	0.537305		CS: Freezing	5	0.38216	0.221976	CS: Freezing	5	-0.220147	0.491749
CS All Trials	Freezing	-0.419837	0.227084	CS All Trials	Freezing	-0.232987	0.466157		CS: Freezing	6	-0.0703179	0.485303	CS: Freezing	6	-0.436748	0.155725
US All Trials	Freezing	-0.22015	0.541091	US All Trials	Freezing	-0.249112	0.434925		CS: Freezing	7	-0.66424	0.260725	CS: Freezing	7	0.0017746	0.995633
US Anti-Peak All Trials	Freezing	-0.378072	0.281388	US Anti-Peak All Trials	Freezing	0.522434	0.0814154		CS: Freezing	8	-0.105821	0.582367	CS: Freezing	8	-0.304027	0.336678
US Rebound All Trials	Freezing	-0.126248	0.728192	US Rebound All Trials	Freezing	0.420687	0.173267		CS: Freezing	9	-0.433037	0.710341	CS: Freezing	9	-0.00113018	0.997219
US Rebound AUC All Trials	Freezing	-0.128012	0.724517	US Rebound AUC All Trials	Freezing	0.55643	0.0602561		CS: Freezing	10	-0.332058	0.580327	CS: Freezing	10	0.180458	0.57463
CS All Trials	Latency	0.450653	0.191185	CS All Trials	Latency	0.091889	0.776394		CS: Freezing	11	0.16915	0.199587	CS: Freezing	11	0.0730889	0.821408
US All Trials	Latency	0.17146	0.635764	US All Trials	Latency	0.242853	0.446926		CS: Freezing	12	-0.0417257	0.659143	CS: Freezing	12	0.0422313	0.896318
US Anti-Peak All Trials	Latency	0.340474	0.335711	US Anti-Peak All Trials	Latency	-0.468238	0.124723		CS: Freezing	13	-0.321793	0.821348	CS: Freezing	13	0.334623	0.287714
US Rebound All Trials	Latency	-0.0597773	0.869703	US Rebound All Trials	Latency	-0.538426	0.0709165		CS: Freezing	14	-0.0528786	0.907252	CS: Freezing	14	0.308204	0.329744
US Rebound AUC All Trials	Latency	0.00652071	0.985737	US Rebound AUC All Trials	Latency	-0.67409	0.0162209		CS: Freezing	15	-0.13665	0.821604	CS: Freezing	15	-0.0613956	0.849666
									CS: Latency	1	0.39084	0.200009	CS: Latency	1	0.584282	0.046043
									CS: Latency	2	0.140813	0.872632	CS: Latency	2	0.150813	0.639886
									CS: Latency	3	0.494017	0.740692	CS: Latency	3	0.176599	0.582974
									CS: Latency	4	0.206255	0.408729	CS: Latency	4	0.272373	0.391736
									CS: Latency	5	-0.544831	0.145591	CS: Latency	5	0.118398	0.714007
									CS: Latency	6	-0.0131051	0.449574	CS: Latency	6	0.295283	0.351448
									CS: Latency	7	0.571307	0.474782	CS: Latency	7	-0.167492	0.602846
									CS: Latency	8	0.0530687	0.43816	CS: Latency	8	0.180016	0.575583
									CS: Latency	9	0.392709	0.618494	CS: Latency	9	-0.072253	0.823422
									CS: Latency	10	0.244287	0.686519	CS: Latency	10	-0.219997	0.492052
									CS: Latency	11	-0.229382	0.386055	CS: Latency	11	-0.234042	0.464083
									CS: Latency	12	-0.0778249	0.803019	CS: Latency	12	-0.184544	0.56585
									CS: Latency	13	0.170186	0.782875	CS: Latency	13	-0.467699	0.125217
									CS: Latency	14	0.0320748	0.98693	CS: Latency	14	-0.409325	0.186395
									CS: Latency	15	0.00833553	0.666391	CS: Latency	15	-0.00271053	0.99333
Fear Conditioning: Interleaved Light
Measure	Statistical Test	Factor	Statistic	p	n
Freezing: Trials 1-10	2-Way RM ANOVA	Interaction	F (9, 153) = 0.257	0.9847	WT = 9; KO = 10
Freezing: Trials 1-10	2-Way RM ANOVA	Trial	F (9, 153) = 27.93	<0.0001	WT = 9; KO = 10
Freezing: Trials 1-10	2-Way RM ANOVA	Genotype	F (1, 17) = 0.008532	0.9275	WT = 9; KO = 10
Condition 1	Condition 2	Experiment	Genotype	Statistical Test	Statistic	p	Cond 1 Mean, SEM, n	Cond 2 Mean, SEM, n
+/+ Tone Only	+/+ Light and Tone	Interleaved Light: Freezing	WT	Unpaired t-Test, Two-Tailed	t=1.656 df=20	0.1134	6.867 ± 0.3801, n=9	7.676 ± 0.3103, n=13
+/+ Interleaved Light	+/+ Tone Only	Interleaved Light: Freezing	WT	Paired t-Test, Two-Tailed	t=0.4156 df=8	0.6886	6.593 ± 0.7931, n=9	6.867 ± 0.3801, n=9
+/- Tone Only	+/- Light and Tone	Interleaved Light: Freezing	KO	Unpaired t-Test, Two-Tailed	t=3.745 df=26	0.0009	7.52 ± 0.4716, n=10	5.287 ± 0.3588, n=18
+/- Interleaved Light	+/- Tone Only	Interleaved Light: Freezing	KO	Paired t-Test, Two-Tailed	t=5.295 df=9	0.0005	4.233 ± 0.6345, n=10	7.52 ± 0.4716, n=10
+/+ Tone Only	+/+ Light and Tone	Interleaved Light: Latency	WT	Unpaired t-Test, Two-Tailed	t=0.8112 df=20	0.4268	1.764 ± 0.2288, n=9	2.088 ± 0.2901, n=13
+/+ Interleaved Light	+/+ Tone Only	Interleaved Light: Latency	WT	Paired t-Test, Two-Tailed	t=1.448 df=8	0.1856	2.856 ± 0.7644, n=9	1.764 ± 0.2288, n=9
+/- Tone Only	+/- Light and Tone	Interleaved Light: Latency	KO	Unpaired t-Test, Two-Tailed	t=3.746 df=26	0.0009	1.251 ± 0.3629, n=10	3.869 ± 0.4775, n=18
+/- Interleaved Light	+/- Tone Only	Interleaved Light: Latency	KO	Paired t-Test, Two-Tailed	t=3.476 df=9	0.007	4.006 ± 0.8192, n=10	1.251 ± 0.3629, n=10
Measure	Experiment	Statistical Test	Statistic	p	WT Mean, SEM, n	KO Mean, SEM, n
Fear Conditioning: Acquisition Rate	Interleaved Light	Unpaired t-Test, Two-Tailed	t=0.03326 df=17	0.9739	1.27 ± 0.1463, n=9	1.264 ± 0.08833, n=10

## Sheet: dLight Light or Tone
Light and Tone Response Features: WT vs KO
Multiple t-tests
Feature	t-ratio	q	df	n	Notes
Light Response z-score	4.536	0.000268377	18	WT = 10; KO = 10	Two-stage linear step-up procedure of Benjamini, Krieger and Yekutieli, with Q = 5%
Tone Response z-score	0.9074	0.197492	18	WT = 10; KO = 10	Two-stage linear step-up procedure of Benjamini, Krieger and Yekutieli, with Q = 5%
Light Response DF/F	3.414	0.00312657	18	WT = 10; KO = 10	Two-stage linear step-up procedure of Benjamini, Krieger and Yekutieli, with Q = 5%
Tone Response DF/F	0.9021	0.191355	18	WT = 10; KO = 10	Two-stage linear step-up procedure of Benjamini, Krieger and Yekutieli, with Q = 5%
Property	Analysis Type	Statistical Test	Factor	Statistic	p	n
Light vs Tone, WT vs KO	z-scored	2-Way RM ANOVA	Interaction	F (1, 36) = 7.266	0.0106	WT = 10; KO = 10
Light vs Tone, WT vs KO	z-scored	2-Way RM ANOVA	Stimulus	F (1, 36) = 71.02	<0.0001	WT = 10; KO = 10
Light vs Tone, WT vs KO	z-scored	2-Way RM ANOVA	Genotype	F (1, 36) = 15.48	0.0004	WT = 10; KO = 10
Light:WT vs. Light:KO	z-scored	Bonferroni's multiple comparisons test		t = 4.688	0.0002	WT = 10; KO = 10
Light:WT vs. Tone:WT	z-scored	Bonferroni's multiple comparisons test		t = 4.053	0.0015	WT = 10; KO = 10
Light:WT vs. Tone:KO	z-scored	Bonferroni's multiple comparisons test		t = 3.177	0.0183	WT = 10; KO = 10
Light:KO vs. Tone:WT	z-scored	Bonferroni's multiple comparisons test		t = 8.741	<0.0001	WT = 10; KO = 10
Light:KO vs. Tone:KO	z-scored	Bonferroni's multiple comparisons test		t = 7.865	<0.0001	WT = 10; KO = 10
Tone:WT vs. Tone:KO	z-scored	Bonferroni's multiple comparisons test		t = 0.876	>0.9999	WT = 10; KO = 10
Light Onset Peak by Trial
Property	Analysis Type	Statistical Test	Factor	Statistic	p	n
Light Onset Response: WT vs KO	z-scored	2-Way RM ANOVA	Interaction	F (8, 144) = 2.782	0.0068	WT = 10; KO = 10
Light Onset Response: WT vs KO	z-scored	2-Way RM ANOVA	Trial	F (8, 144) = 3.254	0.002	WT = 10; KO = 10
Light Onset Response: WT vs KO	z-scored	2-Way RM ANOVA	Genotype	F (1, 18) = 20.31	0.0003	WT = 10; KO = 10
WT vs KO: Trial 1	z-scored	Bonferroni's multiple comparisons test		t = 5.617	<0.0001	WT = 10; KO = 10
WT vs KO: Trial 2	z-scored	Bonferroni's multiple comparisons test		t = 2.212	0.2553	WT = 10; KO = 10
WT vs KO: Trial 3	z-scored	Bonferroni's multiple comparisons test		t = 2.778	0.0551	WT = 10; KO = 10
WT vs KO: Trial 4	z-scored	Bonferroni's multiple comparisons test		t = 2.153	0.2953	WT = 10; KO = 10
WT vs KO: Trial 5	z-scored	Bonferroni's multiple comparisons test		t = 4.49	0.0001	WT = 10; KO = 10
WT vs KO: Trial 6	z-scored	Bonferroni's multiple comparisons test		t = 1.967	0.4585	WT = 10; KO = 10
WT vs KO: Trial 7	z-scored	Bonferroni's multiple comparisons test		t = 3.118	0.0194	WT = 10; KO = 10
WT vs KO: Trial 8	z-scored	Bonferroni's multiple comparisons test		t = 1.288	>0.9999	WT = 10; KO = 10
WT vs KO: Trial 9	z-scored	Bonferroni's multiple comparisons test		t = 2.338	0.1853	WT = 10; KO = 10
Light Onset Response: WT vs KO	DF/F	2-Way RM ANOVA	Interaction	F (8, 144) = 2.445	0.0165	WT = 10; KO = 10
Light Onset Response: WT vs KO	DF/F	2-Way RM ANOVA	Trial	F (8, 144) = 2.466	0.0156	WT = 10; KO = 10
Light Onset Response: WT vs KO	DF/F	2-Way RM ANOVA	Genotype	F (1, 18) = 11.65	0.0031	WT = 10; KO = 10
WT vs KO: Trial 1	DF/F	Bonferroni's multiple comparisons test		t = 4.836	<0.0001	WT = 10; KO = 10
WT vs KO: Trial 2	DF/F	Bonferroni's multiple comparisons test		t = 2.038	0.3888	WT = 10; KO = 10
WT vs KO: Trial 3	DF/F	Bonferroni's multiple comparisons test		t = 2.54	0.1082	WT = 10; KO = 10
WT vs KO: Trial 4	DF/F	Bonferroni's multiple comparisons test		t = 1.911	0.5199	WT = 10; KO = 10
WT vs KO: Trial 5	DF/F	Bonferroni's multiple comparisons test		t = 3.767	0.0021	WT = 10; KO = 10
WT vs KO: Trial 6	DF/F	Bonferroni's multiple comparisons test		t = 1.853	0.5914	WT = 10; KO = 10
WT vs KO: Trial 7	DF/F	Bonferroni's multiple comparisons test		t = 2.775	0.0555	WT = 10; KO = 10
WT vs KO: Trial 8	DF/F	Bonferroni's multiple comparisons test		t = 1.451	>0.9999	WT = 10; KO = 10
WT vs KO: Trial 9	DF/F	Bonferroni's multiple comparisons test		t = 2.311	0.1991	WT = 10; KO = 10
Tone Response by Trial
Property	Analysis Type	Statistical Test	Factor	Statistic	p	n
Tone Response: WT vs KO	z-scored	2-Way RM ANOVA	Interaction	F (8, 144) = 0.9169	0.5044	WT = 10; KO = 10
Tone Response: WT vs KO	z-scored	2-Way RM ANOVA	Trial	F (8, 144) = 0.9504	0.4774	WT = 10; KO = 10
Tone Response: WT vs KO	z-scored	2-Way RM ANOVA	Genotype	F (1, 18) = 0.7054	0.412	WT = 10; KO = 10
Tone Response: WT vs KO	DF/F	2-Way RM ANOVA	Interaction	F (8, 144) = 1.152	0.3326	WT = 10; KO = 10
Tone Response: WT vs KO	DF/F	2-Way RM ANOVA	Trial	F (8, 144) = 0.8627	0.5496	WT = 10; KO = 10
Tone Response: WT vs KO	DF/F	2-Way RM ANOVA	Genotype	F (1, 18) = 0.8138	0.3789	WT = 10; KO = 10

## Sheet: Looming Stimulus
Looming Stimulus
Property	Statistical Test	Statistic	p	WT Mean, SEM, n	KO Mean, SEM, n
Reaction Time	Unpaired t-Test, Two-Tailed	t=0.7901 df=38	0.4344	0.1677 ± 0.01552, n=17	0.155 ± 0.007708, n=23
Latency to Freeze	Unpaired t-Test, Two-Tailed	t=3.241 df=38	0.0025	4.654 ± 0.6399, n=17	2.636 ± 0.2542, n=23
Duration: First Freezing Episode	Unpaired t-Test, Two-Tailed	t=0.6413 df=38	0.5252	22.71 ± 5.191, n=17	18.27 ± 4.544, n=23
Total Freezing: First Minute After Stimulus	Unpaired t-Test, Two-Tailed	t=0.4938 df=38	0.6243	34.38 ± 5.236, n=17	30.89 ± 4.686, n=23
Looming Stimulus by Location: dLight Peaks
Property	Statistical Test	Factor	Statistic	p	n
Reaction Time by Location	2-Way ANOVA	Interaction	F (1, 36) = 0.02527	0.8746	WT Shelter = 7; WT Open Field = 10; KO Shelter = 16; KO Open Field = 7
Reaction Time by Location	2-Way ANOVA	Location	F (1, 36) = 0.1323	0.7182	WT Shelter = 7; WT Open Field = 10; KO Shelter = 16; KO Open Field = 7
Reaction Time by Location	2-Way ANOVA	Genotype	F (1, 36) = 0.3792	0.5419	WT Shelter = 7; WT Open Field = 10; KO Shelter = 16; KO Open Field = 7
Latency to Freeze by Location	2-Way ANOVA	Interaction	F (1, 36) = 2.348	0.1342	WT Shelter = 7; WT Open Field = 10; KO Shelter = 16; KO Open Field = 7
Latency to Freeze by Location	2-Way ANOVA	Location	F (1, 36) = 6.215	0.0174	WT Shelter = 7; WT Open Field = 10; KO Shelter = 16; KO Open Field = 7
Latency to Freeze by Location	2-Way ANOVA	Genotype	F (1, 36) = 15	0.0004	WT Shelter = 7; WT Open Field = 10; KO Shelter = 16; KO Open Field = 7
WT vs KO: Shelter	Bonferroni's multiple comparisons test		t = 3.993	0.0006	WT Shelter = 7; KO Shelter = 16
WT vs KO: Open Field	Bonferroni's multiple comparisons test		t = 1.59	0.2412	WT Open Field = 10; KO Open Field = 7
First Freezing Episode Duration by Location	2-Way ANOVA	Interaction	F (1, 36) = 1.954	0.1707	WT Shelter = 7; WT Open Field = 10; KO Shelter = 16; KO Open Field = 7
First Freezing Episode Duration by Location	2-Way ANOVA	Location	F (1, 36) = 9.512	0.0039	WT Shelter = 7; WT Open Field = 10; KO Shelter = 16; KO Open Field = 7
First Freezing Episode Duration by Location	2-Way ANOVA	Genotype	F (1, 36) = 0.1122	0.7395	WT Shelter = 7; WT Open Field = 10; KO Shelter = 16; KO Open Field = 7
Total Freezing by Location	2-Way ANOVA	Interaction	F (1, 36) = 0.0709	0.7915	WT Shelter = 7; WT Open Field = 10; KO Shelter = 16; KO Open Field = 7
Total Freezing by Location	2-Way ANOVA	Location	F (1, 36) = 12.68	0.0011	WT Shelter = 7; WT Open Field = 10; KO Shelter = 16; KO Open Field = 7
Total Freezing by Location	2-Way ANOVA	Genotype	F (1, 36) = 0.2011	0.6566	WT Shelter = 7; WT Open Field = 10; KO Shelter = 16; KO Open Field = 7
Looming Stimulus: Optogenetic Rescue
Property	Statistical Test	Statistic	p	Group 1 Mean, SEM, n	Group 2 Mean, SEM, n
WT No Laser vs WT Laser	Paired t-Test, Two-Tailed	t=0.01769 df=11	0.9862	5.84 ± 0.9499, n=12	5.819 ± 0.7637, n=12
HET No Laser vs WT No Laser	Unpaired t-Test, Two-Tailed	t=2.361 df=22	0.0275	3.491 ± 0.2959, n=12	5.84 ± 0.9499, n=12
HET No Laser vs WT Laser	Unpaired t-Test, Two-Tailed	t=2.843 df=22	0.0095	3.491 ± 0.2959, n=12	5.819 ± 0.7637, n=12
HET No Laser vs HET Laser	Paired t-Test, Two-Tailed	t=3.823 df=11	0.0028	3.491 ± 0.2959, n=12	7.204 ± 1.009, n=12
HET Laser vs WT Laser	Unpaired t-Test, Two-Tailed	t=1.094 df=22	0.2859	7.204 ± 1.009, n=12	5.819 ± 0.7637, n=12
HET Laser vs WT No Laser	Unpaired t-Test, Two-Tailed	t=0.9838 df=22	0.3359	7.204 ± 1.009, n=12	5.84 ± 0.9499, n=12
